# Supplementary material
Source: publisher figshare collection journal article supplement (https://gsajournals.figshare.com/ndownloader/files/17768243)
Supplement: Supplementary file 1 [file 17768243]

## Sheet: DAVID_Chart_allfdr0,1
Table S3. Analysis of functional categories (Goand pathways) in which differentially expressed genes (DEGs, detected as fdr<0.1, fold change >|1.5|) from RNA-seq comparsions of 16GsoT/T to wild type (WT) cerebellum (CB) and hipocampus (HC) at P14 and P35, as detected using the DAVID Functionbal Annotation "Chart" tool (https://david.ncifcrf.gov/). All results with FDR<10% (score of 10, column N) …
comparision	Category	Term	Count	%	PValue	Genes	List Total	Pop Hits	Pop Total	Fold Enrichment	Bonferroni	Benjamini	FDR
P14_CB_UP	GOTERM_BP_DIRECT	GO:0071376~cellular response to corticotropin-releasing hormone stimulus	3	8.33333	1.09925e-05	NR4A2, NR4A1, NR4A3	26	4	18082	521.596	0.00271148	0.00271148	0.0142523
P14_CB_UP	GOTERM_MF_DIRECT	GO:0035259~glucocorticoid receptor binding	3	8.33333	0.000322007	NR4A2, NR4A1, NR4A3	27	18	17446	107.691	0.0282563	0.0282563	0.348994
P14_CB_UP	GOTERM_MF_DIRECT	GO:0001077~transcriptional activator activity, RNA polymerase II core promoter proximal region sequence-specific binding	5	13.8889	0.000641319	FOS, NR4A2, NR4A1, NR4A3, NPAS4	27	270	17446	11.9657	0.0554964	0.0281442	0.693976
P14_CB_UP	GOTERM_MF_DIRECT	GO:0004879~RNA polymerase II transcription factor activity, ligand-activated sequence-specific DNA binding	3	8.33333	0.00130423	NR4A2, NR4A1, NR4A3	27	36	17446	53.8457	0.10966	0.0379774	1.40671
P14_CB_UP	GOTERM_BP_DIRECT	GO:0045944~positive regulation of transcription from RNA polymerase II promoter	7	19.4444	0.00196294	FOS, EGR4, NR4A2, NR4A1, NR4A3, NPAS4, IL22	26	995	18082	4.89269	0.384502	0.215463	2.51553
P14_CB_UP	GOTERM_BP_DIRECT	GO:0043401~steroid hormone mediated signaling pathway	3	8.33333	0.00242198	NR4A2, NR4A1, NR4A3	26	53	18082	39.3657	0.450614	0.180984	3.0953
P14_CB_UP	GOTERM_MF_DIRECT	GO:0003707~steroid hormone receptor activity	3	8.33333	0.00313032	NR4A2, NR4A1, NR4A3	27	56	17446	34.6151	0.243487	0.0673812	3.34612
P14_CB_UP	GOTERM_BP_DIRECT	GO:1900625~positive regulation of monocyte aggregation	2	5.55556	0.00414227	CD44, NR4A3	26	3	18082	463.641	0.641299	0.226103	5.23986
P14_CB_UP	GOTERM_BP_DIRECT	GO:0045444~fat cell differentiation	3	8.33333	0.00529752	NR4A2, NR4A1, NR4A3	26	79	18082	26.4099	0.730709	0.230791	6.65535
P14_CB_UP	GOTERM_CC_DIRECT	GO:0005667~transcription factor complex	4	11.1111	0.00569154	FOS, NR4A1, NR4A3, NPAS4	28	267	19662	10.5201	0.321676	0.321676	5.70295
P14_CB_UP	GOTERM_BP_DIRECT	GO:0045893~positive regulation of transcription, DNA-templated	5	13.8889	0.00757055	FOS, NR4A2, NR4A1, NR4A3, NPAS4	26	576	18082	6.03699	0.846957	0.268633	9.38363
P14_HC_DN	GOTERM_BP_DIRECT	GO:0007626~locomotory behavior	7	5.78512	3.15822e-05	PENK, PDE1B, ADORA2A, DRD2, RELN, GPR88, RASD2	102	108	18082	11.49	0.0264267	0.0264267	0.0488387
P14_HC_DN	GOTERM_BP_DIRECT	GO:0035815~positive regulation of renal sodium excretion	4	3.30579	4.64495e-05	ADORA2A, DRD2, TACR1, AGT	102	13	18082	54.546	0.0386244	0.0195024	0.0718218
P14_HC_DN	GOTERM_BP_DIRECT	GO:0048143~astrocyte activation	3	2.47934	0.000456662	ADORA2A, AGT, MT2	102	6	18082	88.6373	0.321138	0.121125	0.704014
P14_HC_DN	GOTERM_BP_DIRECT	GO:0001666~response to hypoxia	7	5.78512	0.000728413	VEGFC, PENK, DRD2, HIF3A, RYR1, CYGB, KCNA5	102	192	18082	6.46313	0.460935	0.143139	1.12076
P14_HC_DN	GOTERM_BP_DIRECT	GO:0001975~response to amphetamine	4	3.30579	0.000892535	PDE1B, PPP1R1B, ADORA2A, DRD2	102	34	18082	20.8558	0.531026	0.140532	1.37165
P14_HC_DN	GOTERM_CC_DIRECT	GO:0030424~axon	9	7.43802	0.00100079	IL1R1, GRM2, PENK, ADORA2A, DRD2, MME, RELN, ROBO3, IGSF9	109	370	19662	4.38775	0.164087	0.164087	1.22463
P14_HC_DN	GOTERM_BP_DIRECT	GO:0040018~positive regulation of multicellular organism growth	4	3.30579	0.00154563	DRD2, AGT, STAT5A, GHSR	102	41	18082	17.2951	0.73064	0.196371	2.36416
P14_HC_DN	GOTERM_CC_DIRECT	GO:0016020~membrane	54	44.6281	0.00268321	AP1G2, SLC16A11, NPNT, TACR1, PRRT4, GPR88, EIF4EBP3, HTRA1, SMIM3, ROBO3, GLP2R, ADAM8, KIRREL2, CDHR1, ARHGEF18, CACNG6, FUT10, PNPLA2, VEGFC, GRM2, DGAT2, OTOF, RYR1, DSP, SLC27A3, IGSF9, MYH7B, RASD2, IL1R1, ADORA2A, FKBP5, DRD2, MME, KCNA5, SYNDIG1L, PLIN4, DDX3Y, SLC30A3, SELPLG, TMC7, PRSS56, ASIC4, ACER2, FRMPD1, GJB6, HBA-A2, FAM151A, LAMP5, TMEM114, HBEGF, SCN4B, RGS9, GHSR, MERTK	109	6998	19662	1.39194	0.381798	0.213741	3.25233
P14_HC_DN	GOTERM_CC_DIRECT	GO:0005576~extracellular region	20	16.5289	0.00306922	IL1R1, GLT1D1, NPNT, CRLF1, ADAMTS15, COL15A1, INHA, GAL, VEGFC, FBLN1, PENK, HTRA1, CCBE1, CCL27A, HBEGF, C1QL2, RELN, PLA2G3, THBS3, THPO	109	1753	19662	2.05802	0.423186	0.167575	3.71214
P14_HC_DN	GOTERM_BP_DIRECT	GO:0001963~synaptic transmission, dopaminergic	3	2.47934	0.00352256	ADORA2A, DRD2, RASD2	102	16	18082	33.239	0.949833	0.347854	5.31186
P14_HC_DN	KEGG_PATHWAY	mmu05030:Cocaine addiction	4	3.30579	0.00386045	GRM2, PPP1R1B, DRD2, RGS9	51	49	7691	12.3105	0.28574	0.28574	4.09412
P14_HC_DN	GOTERM_CC_DIRECT	GO:0030672~synaptic vesicle membrane	4	3.30579	0.00460305	DRD2, OTOF, SLC30A3, ABCC8	109	61	19662	11.8285	0.562137	0.186543	5.51944
P14_HC_DN	GOTERM_CC_DIRECT	GO:0030425~dendrite	9	7.43802	0.00563073	GRM2, PENK, ADORA2A, LAMP5, DRD2, TACR1, MME, RELN, IGSF9	109	490	19662	3.3132	0.636054	0.183027	6.71284
P14_HC_DN	GOTERM_CC_DIRECT	GO:0001750~photoreceptor outer segment	4	3.30579	0.00598323	MYO7A, RGS9, INHA, MERTK	109	67	19662	10.7693	0.658434	0.163924	7.11898
P14_HC_UP	GOTERM_CC_DIRECT	GO:0030286~dynein complex	5	3.24675	4.56292e-05	DNAH11, DNALI1, DNAH12, DNAH3, DNAH5	128	31	19662	24.7757	0.00840606	0.00840606	0.0564461
P14_HC_UP	GOTERM_MF_DIRECT	GO:0019911~structural constituent of myelin sheath	3	1.94805	0.000396198	PLP1, MOBP, MAL	112	5	17446	93.4607	0.100401	0.100401	0.518776
P14_HC_UP	KEGG_PATHWAY	mmu00534:Glycosaminoglycan biosynthesis - heparan sulfate / heparin	4	2.5974	0.000596653	NDST4, XYLT1, HS3ST2, HS6ST3	55	24	7691	23.3061	0.0685594	0.0685594	0.681749
P14_HC_UP	GOTERM_BP_DIRECT	GO:0003341~cilium movement	4	2.5974	0.00155996	DNAH11, DNALI1, RSPH4A, DNAH5	120	35	18082	17.221	0.671467	0.671467	2.33251
P14_HC_UP	GOTERM_MF_DIRECT	GO:0003774~motor activity	5	3.24675	0.00161613	DNALI1, DNAH12, MYH3, DNAH3, DNAH5	112	79	17446	9.85873	0.350697	0.194206	2.10056
P14_HC_UP	GOTERM_CC_DIRECT	GO:0016020~membrane	62	40.2597	0.00257561	SC5D, NDST4, TSPAN2, MPEG1, PCDHGA5, KCNJ13, LNPEP, FOS, GRIN2B, XYLT1, CHRNA5, LPCAT2B, SYNJ2, ELOVL7, LBP, NIPAL4, CATIP, CFAP126, UGT8A, FA2H, NPBWR1, CDHR3, NAV3, TMEM74, TMEM132D, TMEM72, SSTR4, NCAM2, CLIC6, KCNH7, PPM1L, CPLX3, ENPP6, TMEM212, ERBB3, GALNT6, KCNA2, HS3ST2, GPR63, ITGB3, CLDN11, BCHE, FOLR1, GPR26, MAN1A, HS6ST3, IPCEF1, KCNE2, PLP1, GABRA2, XKR4, KL, PTPN4, NUF2, MAL, IGSF…	128	6998	19662	1.36093	0.379421	0.212232	3.14075
P14_HC_UP	GOTERM_BP_DIRECT	GO:0044782~cilium organization	3	1.94805	0.00319486	CATIP, CFAP126, MNS1	120	13	18082	34.7731	0.897878	0.680434	4.7225
P14_HC_UP	GOTERM_BP_DIRECT	GO:0008152~metabolic process	10	6.49351	0.00353277	ENPP6, PLA2G4A, NDST4, UGT8A, PAK3, KL, ENPP2, SULF1, MAN1A, LPCAT2B	120	463	18082	3.2545	0.919808	0.568768	5.20961
P14_HC_UP	KEGG_PATHWAY	mmu00565:Ether lipid metabolism	4	2.5974	0.00353608	ENPP6, PLA2G4A, UGT8A, ENPP2	55	44	7691	12.7124	0.343964	0.190039	3.97889
P14_HC_UP	GOTERM_MF_DIRECT	GO:0005509~calcium ion binding	12	7.79221	0.00493962	PLA2G4A, CLGN, CALML4, ENPP2, PCDH11X, SULF1, CDHR3, MAN1A, SYTL5, LPCAT2B, PCDHGA5, THBS4	112	699	17446	2.67413	0.733438	0.356424	6.29277
P14_HC_UP	GOTERM_MF_DIRECT	GO:0005242~inward rectifier potassium channel activity	3	1.94805	0.00707301	KCNE2, KCNH7, KCNJ13	112	20	17446	23.3652	0.849712	0.377369	8.89573
P35_CB_DN	GOTERM_MF_DIRECT	GO:0003676~nucleic acid binding	122	10.383	5.7053e-12	RBM3, ZFP788, ZFP783, ZGPAT, ZFP781, ZFP933, DDX17, ZFP931, DDX11, ZFP930, TARDBP, TIA1, TIGD3, ZFP939, ZFP938, PAN2, PABPN1, ZFP692, RREB1, NEIL1, PRDM9, TIAL1, GM14288, GM14443, SRSF10, ENPP1, ENPP2, PNPT1, MYEF2, IGF2BP3, ZFP758, ZFP759, 2610008E11RIK, ZFP950, ZFP760, DDX3Y, 1700048O20RIK, ZFP959, ZFP811, ZFP958, POLQ, ZFP810, PLAG1, ZBTB48, ZFP605, CSTF2, ZMYM6, ZFP512B, KLF11, ZFP606, ZFP445…	907	1237	17446	1.89705	5.34018e-09	5.34018e-09	8.93824e-09
P35_CB_DN	GOTERM_BP_DIRECT	GO:0007155~cell adhesion	59	5.02128	3.51696e-09	CTNNAL1, IGFBP7, BCAM, POSTN, VTN, CXADR, PNN, CD93, COL12A1, ESAM, DPP4, PTPRK, EGFL7, ADGRE5, PKN2, ACKR3, CERCAM, CTNNA3, HES1, AMIGO3, PGM5, CD34, EMP2, CDH1, SCARF1, PXN, CDH5, SCARF2, COL7A1, COL6A1, COL8A1, COL8A2, HAPLN2, B4GALT1, FLRT2, PODXL, ITGA1, COL15A1, CELSR3, TMEM8, PCDH15, NID2, ITGA4, COL16A1, TINAGL1, KITL, EPHA1, COL5A1, LAMA4, COL19A1, EPHA8, LAMA5, FBLN5, ITGA8, FREM1, PECA…	948	485	18082	2.32032	1.11874e-05	1.11874e-05	6.37421e-06
P35_CB_DN	GOTERM_CC_DIRECT	GO:0005578~proteinaceous extracellular matrix	43	3.65957	1.1346e-08	PXDN, LTBP2, ADAMTS16, LUM, ELN, COL3A1, VTN, POSTN, DCN, MMRN2, COL9A1, OGN, TNFRSF11B, HMCN1, COL7A1, COL27A1, COL6A1, COL12A1, ADAMTS10, COL8A1, COL11A2, COL8A2, MYOC, HAPLN2, FLRT2, BMP1, TNXB, COL4A1, ADAMTS20, COL15A1, NID2, COL16A1, COL5A2, COL5A1, WNT2B, ADAMTS6, LAMA4, ADAMTS8, COL19A1, CLEC3B, LAMA5, FBLN5, FREM1	999	316	19662	2.6782	6.05872e-06	6.05872e-06	1.64897e-05
P35_CB_DN	GOTERM_CC_DIRECT	GO:0031012~extracellular matrix	41	3.48936	1.29819e-08	PXDN, PDGFB, LTBP2, ADAMTS16, IGFBP7, LUM, COL3A1, VTN, POSTN, DCN, MMP23, PCOLCE, MMRN2, CFP, OGN, CD93, COL6A1, ADAMTS10, COL12A1, AGRN, COL8A1, COL8A2, MYOC, FGFBP3, TNXB, COL4A1, EGFL7, ADAMTS20, COL15A1, MGP, NID2, COL5A3, TINAGL1, COL5A2, FLNB, FLNA, COL5A1, ADAMTS8, LAMA5, FBLN5, CLEC14A	999	294	19662	2.74472	6.93232e-06	3.46617e-06	1.88674e-05
P35_CB_DN	GOTERM_CC_DIRECT	GO:0005856~cytoskeleton	100	8.51064	3.00115e-08	KIFC2, CTNNAL1, CROCC, DZIP1, CD2AP, HOOK3, CEP70, HOOK1, HOOK2, ANKRD53, CEP295, CEP83, ROCK1, NEIL1, RAI14, CTNNA3, MKS1, PGM5, FNBP1L, LCA5, SNTG1, CEP95, NEK1, SSH3, SLF1, LRRCC1, NOSTRIN, CNTRL, PXN, KATNA1, TEK, FBXO5, DRC7, STRBP, FGD5, GAS2, KITL, CSPP1, NEDD1, UACA, MYO15, FAM161A, MYO19, CCDC78, MYLK, KIF24, ERCC6L2, MYO7A, PINK1, CCDC39, TTLL3, DES, EVI5, NOS3, CNTLN, CEP112, RPGR, ACT…	999	1113	19662	1.76835	1.6026e-05	5.34203e-06	4.36174e-05
P35_CB_DN	GOTERM_MF_DIRECT	GO:0046872~metal ion binding	240	20.4255	4.11914e-08	DZIP3, MASP2, DZIP1, POSTN, RNF213, NMRK1, BBOX1, ZGPAT, G2E3, ZFP933, ZFP931, DDX11, PLOD2, ZFP930, MAP3K8, ZFP939, ZFP938, ROCK1, YY2, ADAMTS20, RREB1, COLEC12, LPCAT2, CARNS1, PGM5, PRDM9, ADAMTS8, F5, MTF2, ZFP280C, TRMT13, YME1L1, ENPP1, ENPP2, NEK1, ZFP758, ZFP759, PDSS1, PXN, 2610008E11RIK, ZFP950, P3H3, FBXO5, ZFP959, ZFP958, ZFP811, ZFP810, PLAG1, AGBL3, ZBTB48, BMP1, ZFP605, ZFP512B, KL…	907	3355	17446	1.37596	3.85544e-05	1.92774e-05	6.45325e-05
P35_CB_DN	GOTERM_CC_DIRECT	GO:0009986~cell surface	63	5.3617	4.31241e-07	NRP1, ACVRL1, PDGFB, ADGRF5, H2-D1, BCAM, RPS6KB1, CXADR, CD93, AQP11, CD46, RSPO2, TRPV4, LBP, NT5E, DPP4, H2-K1, VASN, PTPRK, PLXNB3, ACKR3, SYNJ2BP, ACVR2A, THBD, ABCB1A, CD34, VEGFA, TFPI, ADGRA2, EMP2, ABCA7, CAV2, CAV1, ENPP1, CDH1, CDH5, FOLR1, TEK, HEG1, KCNE2, FLT3L, AGRN, ENTPD1, B4GALT1, H2-Q4, HPN, TGFBR2, ITGA1, NID2, ITGA4, KDR, FZD6, PROM1, CD55, PROM2, THSD1, PRLR, GRIA2, ITGA8, I…	999	629	19662	1.9713	0.000230256	5.7569e-05	0.000626745
P35_CB_DN	GOTERM_CC_DIRECT	GO:0005581~collagen trimer	18	1.53191	7.3642e-07	COL4A1, COL3A1, COL15A1, COLEC12, COL16A1, COL5A2, PCOLCE, COL5A1, COL9A1, COL19A1, COL7A1, COL27A1, COL6A1, COL12A1, COL8A1, COL11A2, COL8A2, COL20A1	999	83	19662	4.26832	0.000393171	7.86466e-05	0.00107028
P35_CB_DN	KEGG_PATHWAY	mmu04510:Focal adhesion	28	2.38298	8.91153e-07	CAV2, CAV1, PDGFB, COL3A1, VTN, PXN, MYL9, COL27A1, COL6A1, COL11A2, TNXB, COL4A1, ROCK1, ITGA1, IGF1, ITGA4, COL5A3, COL5A2, FLNB, FLNA, COL5A1, KDR, LAMA4, LAMA5, ITGA8, ITGA7, VEGFA, MYLK	357	207	7691	2.91409	0.000213854	0.000213854	0.00115025
P35_CB_DN	KEGG_PATHWAY	mmu04512:ECM-receptor interaction	17	1.44681	2.17256e-06	COL4A1, TNXB, COL3A1, ITGA1, VTN, ITGA4, COL5A3, COL5A2, COL5A1, LAMA4, LAMA5, ITGA8, COL27A1, ITGA7, COL6A1, AGRN, COL11A2	357	88	7691	4.1618	0.00052128	0.000260674	0.0028042
P35_CB_DN	GOTERM_BP_DIRECT	GO:0006355~regulation of transcription, DNA-templated	169	14.383	1.83863e-06	PTTG1, ZFP788, PNN, SFSWAP, ZGPAT, GATA2, DDX17, ZFP933, ZFP781, FLI1, ZFP931, ZFP930, TARDBP, PHTF1, ZFP939, ZFP938, GABPB2, ZFP692, YY2, RREB1, RBL1, HDAC10, PROX2, HES1, MSX1, PRDM9, ZFP280C, AKAP8, GM14288, GM14443, SRSF10, CIART, IGF2BP3, ELK3, MYBL1, ZFP758, ZFP759, 2610008E11RIK, ZFP950, ZFP760, 1700048O20RIK, MTERF2, ZFP959, ARNTL2, ZFP958, ZFP811, ZFP810, TCF3, PLAG1, ZBTB48, ZFP605, CRE…	948	2279	18082	1.41443	0.00583163	0.00292008	0.00333233
P35_CB_DN	GOTERM_CC_DIRECT	GO:0016607~nuclear speck	28	2.38298	5.47239e-06	SRSF1, MALAT1, SRSF10, PNISR, DUSP11, PNN, SRRM2, TARDBP, LUC7L2, SNRNP70, PRPF40B, RBM25, LUC7L3, PRPF40A, PABPN1, DGKQ, SRP54A, RREB1, RING1, AKAP8L, CCNL1, FAM76B, CCNL2, SRSF2, SRSF5, SRSF6, THOC2, THOC1	999	205	19662	2.68823	0.002918	0.000486925	0.00795304
P35_CB_DN	GOTERM_BP_DIRECT	GO:0001525~angiogenesis	31	2.6383	8.2681e-06	SAT1, EMCN, CAV1, NRP1, ACVRL1, LEPR, ENPEP, ELK3, RNF213, MMRN2, TEK, ROBO4, SOX18, NOS3, TIE1, SOX17, COL8A1, COL8A2, PTPRB, COL4A1, EGFL7, ACKR3, UBP1, EPHA1, FLNA, KDR, KRIT1, PECAM1, VEGFA, ADGRA2, ENG	948	239	18082	2.47401	0.0259581	0.00872867	0.0149842
P35_CB_DN	GOTERM_BP_DIRECT	GO:0001570~vasculogenesis	15	1.2766	9.25293e-06	CAV1, EGFL7, TGFBR2, ACKR3, KDR, FBXW7, ZFP950, TEK, HEG1, GLMN, SOX18, TIE1, SOX17, ENG, HDAC7	948	68	18082	4.20746	0.0290048	0.00733142	0.0167689
P35_CB_DN	GOTERM_CC_DIRECT	GO:0005814~centriole	19	1.61702	1.16676e-05	SCLT1, CEP295, KIF24, CEP83, ROCK1, CEP192, CEP135, CROCC, DZIP1, LRRCC1, CETN3, SFI1, MKS1, NEDD1, SASS6, BNIP2, ODF2, CNTLN, CCDC78	999	111	19662	3.36894	0.00621115	0.000889678	0.0169558
P35_CB_DN	GOTERM_CC_DIRECT	GO:0016324~apical plasma membrane	37	3.14894	1.17121e-05	ABCA7, SHROOM4, SLC6A20A, MYO7A, ANO1, ENPEP, AMOTL1, AQP1, DDR2, SLC29A1, NOD1, FOLR1, TEK, RAPGEF6, TRPV4, SLC22A5, DPP4, TCIRG1, HPN, STX3, KL, ARHGEF18, PODXL, STXBP2, DLL1, FZD6, ABCG2, PROM1, CD55, PROM2, ABCB1A, CD34, CLDN1, AKAP7, IGFBP2, EMP2, ABCC6	999	328	19662	2.22019	0.00623479	0.000781482	0.0170205
P35_CB_DN	GOTERM_BP_DIRECT	GO:0030198~extracellular matrix organization	19	1.61702	2.56381e-05	B4GALT1, RECK, PXDN, COL4A1, TNXB, ADAMTS20, ELN, VTN, POSTN, NID2, COL5A3, NPHP3, TNFRSF11B, LAMA4, COL19A1, LAMA5, COL27A1, ITGA8, FBLN5	948	114	18082	3.17897	0.0783189	0.0161789	0.0464569
P35_CB_DN	KEGG_PATHWAY	mmu02010:ABC transporters	11	0.93617	3.64296e-05	ABCA7, ABCC9, ABCA9, ABCB1A, ABCC10, ABCD4, ABCC12, ABCA4, ABCC5, ABCC6, ABCG2	357	46	7691	5.15169	0.00870515	0.00291018	0.0470113
P35_CB_DN	GOTERM_CC_DIRECT	GO:0005622~intracellular	118	10.0426	3.27289e-05	CTNNAL1, EDN3, STK38, PDGFB, INTS2, ZFP788, RGL2, ZFP933, CHIC1, ZFP781, ZFP931, ZFP930, OGT, ZFP938, ROCK1, DFFB, HES1, RND3, PRDM9, MAPK7, SLC40A1, TRIM39, GM14288, CAV2, ABCA7, RAB7B, CAV1, GM14443, MAP4K2, MTIF2, ZFP758, BC005561, ZFP759, 2610008E11RIK, ZFP950, ZFP760, 1700048O20RIK, ZFP811, ZFP958, ZFP810, ZFP605, ZFP606, ZFP445, DVL1, GM14326, ZFP942, GM14325, CDC42BPG, ADAP2, ZFP944, TRIM5…	999	1599	19662	1.45243	0.0173257	0.00194006	0.0475562
P35_CB_DN	GOTERM_MF_DIRECT	GO:0005201~extracellular matrix structural constituent	11	0.93617	3.49255e-05	HAPLN2, PXDN, COL4A1, COL27A1, COL3A1, ELN, MGP, COL11A2, COL5A3, COL5A2, COL5A1	907	41	17446	5.16057	0.0321623	0.0108378	0.054702
P35_CB_DN	KEGG_PATHWAY	mmu04974:Protein digestion and absorption	15	1.2766	4.54812e-05	COL4A1, COL3A1, ELN, COL15A1, COL5A3, COL5A2, COL5A1, KCNJ13, COL9A1, COL7A1, COL27A1, COL6A1, COL12A1, COL11A2, DPP4	357	88	7691	3.67217	0.0108564	0.00272521	0.0586889
P35_CB_DN	GOTERM_BP_DIRECT	GO:0007160~cell-matrix adhesion	15	1.2766	4.72076e-05	TNXB, COL3A1, ITGA1, VTN, BCAM, ITGA4, NID2, COL5A3, PXN, SNED1, CD34, ITGA8, FREM1, TEK, EMP2	948	78	18082	3.66805	0.139439	0.0247179	0.0855254
P35_CB_DN	GOTERM_CC_DIRECT	GO:0071004~U2-type prespliceosome	7	0.595745	8.69145e-05	SF3B1, LUC7L2, PRPF39, SNRNP70, PRPF40B, LUC7L3, PRPF40A	999	16	19662	8.61074	0.0453537	0.00463068	0.126244
P35_CB_DN	GOTERM_MF_DIRECT	GO:0016887~ATPase activity	25	2.12766	0.000114981	DNAH7B, KIFC2, DNAH11, ABCA7, ABCA9, KIF24, KIF15, ABCC10, MYH6, ABCC12, ABCA4, HLTF, RNF213, ATP13A5, ABCG2, CARNS1, ATP13A4, ABCC9, ABCB1A, KATNA1, ABCD4, MYO19, ENTPD1, ABCC5, ABCC6	907	200	17446	2.40436	0.102039	0.0265484	0.179983
P35_CB_DN	GOTERM_CC_DIRECT	GO:0005576~extracellular region	124	10.5532	0.000131172	GNPTG, EDN3, GLB1L, LYPD6, LTBP2, PDGFB, MASP2, 1190007I07RIK, POSTN, VTN, LUZP2, CXCL12, B2M, MMRN2, CFP, OGN, TTR, HMCN1, PAPPA, SOSTDC1, CD46, CFH, COL12A1, IZUMO4, AMY1, RNLS, ADAMTS20, MGP, SERPING1, ADAMTS8, F5, CD34, CD59A, VEGFA, TFPI, ENPP1, ENPP2, ELN, IL34, CHIL5, VWA5B1, FOLR1, BCHE, 1600002K03RIK, TEK, AGRN, ANGPTL2, SRGN, B4GALT1, BMP1, PCDH15, TINAGL1, COL16A1, KITL, KDR, LAMA4, LA…	999	1753	19662	1.3922	0.0676531	0.00634798	0.19047
P35_CB_DN	GOTERM_MF_DIRECT	GO:0042626~ATPase activity, coupled to transmembrane movement of substances	11	0.93617	0.000175564	ABCA7, ABCC9, ABCA9, ABCB1A, ABCC10, ABCD4, ABCC12, ABCA4, ABCC5, ABCC6, ABCG2	907	49	17446	4.31803	0.151548	0.0323341	0.274693
P35_CB_DN	GOTERM_MF_DIRECT	GO:0019838~growth factor binding	10	0.851064	0.000249833	FGFBP3, ACVR2A, TNXB, NRP1, LTBP2, IGFBP7, VEGFA, TEK, IGFBP2, KDR	907	42	17446	4.57972	0.208538	0.0382289	0.390685
P35_CB_DN	GOTERM_CC_DIRECT	GO:0005604~basement membrane	15	1.2766	0.0003763	COL4A1, COL15A1, VTN, NID2, COL5A1, MMRN2, LAMA4, HMCN1, COL7A1, LAMA5, FREM1, VEGFA, AGRN, COL8A1, COL8A2	999	97	19662	3.04356	0.182073	0.016609	0.545507
P35_CB_DN	KEGG_PATHWAY	mmu04350:TGF-beta signaling pathway	13	1.10638	0.000497638	ROCK1, E2F5, RBL1, TGFBR2, RPS6KB2, RPS6KB1, DCN, ACVR2A, NBL1, ID1, ZFYVE16, CHRD, BMP6	357	85	7691	3.29488	0.112603	0.0236094	0.640426
P35_CB_DN	GOTERM_BP_DIRECT	GO:0048754~branching morphogenesis of an epithelial tube	9	0.765957	0.00044804	TMEM67, B4GALT1, MKS1, LAMA5, VEGFA, MGP, IGF1, PXN, KDR	948	36	18082	4.76846	0.75962	0.18425	0.80893
P35_CB_DN	GOTERM_CC_DIRECT	GO:0016323~basolateral plasma membrane	23	1.95745	0.0006682	B4GALT1, ENPP1, PDGFB, LEPR, SLC22A8, MAP4K2, ERBIN, LIN7C, CDH1, CXADR, AQP1, MTTP, SLC29A1, NOD1, PROM2, FOLR1, CD46, TEK, SLC22A6, SLC22A5, ENTPD1, SLC40A1, ABCC6	999	203	19662	2.22994	0.300184	0.0270833	0.966755
P35_CB_DN	GOTERM_BP_DIRECT	GO:0051894~positive regulation of focal adhesion assembly	7	0.595745	0.000558838	ROCK1, ENPP2, VEGFA, TEK, COL16A1, MYOC, KDR	948	21	18082	6.35795	0.831052	0.199301	1.00802
P35_CB_DN	KEGG_PATHWAY	mmu04151:PI3K-Akt signaling pathway	31	2.6383	0.000793912	PDGFB, COL3A1, RPS6KB2, VTN, RPS6KB1, COL27A1, TEK, COL6A1, MTCP1, NOS3, COL11A2, CHUK, TNXB, COL4A1, SGK3, PKN2, ITGA1, IGF1, ITGA4, COL5A3, KITL, COL5A2, COL5A1, KDR, LAMA4, PRLR, LAMA5, LPAR6, ITGA8, ITGA7, VEGFA	357	351	7691	1.90269	0.173549	0.0312697	1.01991
P35_CB_DN	GOTERM_CC_DIRECT	GO:0005813~centrosome	39	3.31915	0.000815107	HAUS3, CROCC, NEK1, CEP95, SLF1, LRRCC1, CETN3, CNTRL, CEP70, HOOK3, CCDC141, ODF2L, HOOK2, DDX11, CEP57, KATNA1, ODF2, TCEA2, CEP112, CEP295, SCLT1, RPGR, 1700029J07RIK, CEP192, CEP135, PKN2, LRRC45, SFI1, CEP44, CAPRIN2, CDC25B, TMEM67, CSPP1, MKS1, NEDD1, SASS6, TRIM59, ID1, FAM161A	999	435	19662	1.76456	0.353023	0.0306244	1.17813
P35_CB_DN	GOTERM_MF_DIRECT	GO:0000166~nucleotide binding	132	11.234	0.000824418	KIFC2, PRPF4B, STK38, RBM3, RPS6KB2, RPS6KB1, CLK1, NMRK1, DMPK, DDX17, DDX11, TARDBP, TIA1, CLK4, MAP3K8, ORC4, MATK, PABPN1, ROCK1, ABCC10, MYH6, ABCC12, CARNS1, NVL, RND3, ABCB1A, TIAL1, AKAP7, YME1L1, MAPK7, GBP3, LRRK1, ABCA7, RAB7B, IFIH1, ABCA9, SRSF10, NEK1, SRSF11, MAP4K2, MYEF2, IGF2BP3, ABCA4, MTIF2, KATNA1, DDX3Y, TEK, POLQ, ENTPD1, CSTF2, TGFBR2, SMG1, ATAD5, ATP11C, ATR, EPHA1, ATP1…	907	1936	17446	1.31147	0.5379	0.104418	1.28379
P35_CB_DN	GOTERM_MF_DIRECT	GO:0005518~collagen binding	11	0.93617	0.000839437	CTSK, TNXB, PDGFB, LUM, ITGA1, VTN, DCN, DDR2, PCOLCE, DPP4, SRGN	907	59	17446	3.58616	0.544356	0.0935826	1.30704
P35_CB_DN	GOTERM_BP_DIRECT	GO:0007043~cell-cell junction assembly	5	0.425532	0.000761992	CLDN5, TRPV4, HEG1, HDAC7, CDH5	948	9	18082	10.5966	0.911506	0.236181	1.37208
P35_CB_DN	COG_ONTOLOGY	Defense mechanisms	7	0.595745	0.00172439	ABCC9, ABCA9, ABCB1A, ABCC10, ABCC12, SLC47A1, ABCC5	157	19	2126	4.98894	0.0488185	0.0488185	1.44667
P35_CB_DN	GOTERM_BP_DIRECT	GO:0006397~mRNA processing	32	2.7234	0.000824627	SRSF1, PRPF4B, SRSF10, PNPT1, PNN, SF3B1, SFSWAP, SRRM2, TARDBP, MAGOHB, PRPF40B, RBM25, LUC7L3, PRPF40A, PAN2, PABPN1, CSTF2, AKAP8L, PRPF39, GCFC2, SRSF2, SNRNP48, SRSF5, CLASRP, SRSF6, SRSF9, ZRANB2, ERN1, CPSF6, RBM39, THOC2, THOC1	948	322	18082	1.89554	0.927504	0.230814	1.48406
P35_CB_DN	GOTERM_MF_DIRECT	GO:0005524~ATP binding	106	9.02128	0.00105497	KIFC2, PRPF4B, STK38, RPS6KB2, RPS6KB1, CLK1, NMRK1, DMPK, DDX17, DDX11, MAP3K8, CLK4, ORC4, MATK, ROCK1, ABCC10, MYH6, ABCC12, CARNS1, NVL, ABCB1A, YME1L1, MAPK7, LRRK1, NRBP2, DNAH11, ABCA7, IFIH1, ABCA9, ENPP1, NEK1, PFKFB2, MAP4K2, ABCA4, KATNA1, DDX3Y, TEK, POLQ, ENTPD1, TGFBR2, ATP11B, SMG1, ATAD5, ATP11C, ATR, EPHA1, ATP13A5, ABCG2, ATP13A4, KDR, DNA2, CDC42BPG, KCNJ8, EPHA8, MYO15, MYH11,…	907	1507	17446	1.35295	0.62767	0.103964	1.64005
P35_CB_DN	GOTERM_CC_DIRECT	GO:0005911~cell-cell junction	22	1.87234	0.00139628	FLRT2, PTPRK, HPN, STX3, CLDN5, LIN7C, PRKCH, CDH1, ITGA4, WTIP, CXADR, CD2AP, CDH5, FLNA, PNN, USP53, KIRREL, KRIT1, TEK, HEG1, AHNAK, MYLK	999	201	19662	2.15421	0.525805	0.0485255	2.01024
P35_CB_DN	GOTERM_BP_DIRECT	GO:0017145~stem cell division	5	0.425532	0.00121747	FUBP1, TIAL1, WWTR1, THOC2, SAMD9L	948	10	18082	9.53692	0.979248	0.296919	2.18371
P35_CB_DN	GOTERM_BP_DIRECT	GO:0016337~single organismal cell-cell adhesion	15	1.2766	0.00150607	EMCN, TNXB, CLDN5, CDH1, ITGA4, CXADR, CD2AP, CTNNA3, CDH5, PNN, CD93, KIRREL, CD34, TEK, ESAM	948	108	18082	2.64914	0.991724	0.329369	2.69472
P35_CB_DN	GOTERM_CC_DIRECT	GO:0005685~U1 snRNP	6	0.510638	0.00213584	LUC7L2, PRPF39, SNRNP70, PRPF40B, LUC7L3, PRPF40A	999	19	19662	6.21527	0.680742	0.0688732	3.05967
P35_CB_DN	KEGG_PATHWAY	mmu04610:Complement and coagulation cascades	11	0.93617	0.00248162	CD55, THBD, F5, MASP2, CD59A, CD46, TFPI, CFH, SERPING1, SERPIND1, PROS1	357	76	7691	3.11813	0.44917	0.0816621	3.15625
P35_CB_DN	GOTERM_CC_DIRECT	GO:0070062~extracellular exosome	168	14.2979	0.0022215	GNPTG, GNPDA1, LTBP2, CROCC, MASP2, VTN, ENPEP, AQP1, ALDH1L2, CD2AP, CXCL12, BBOX1, B2M, MMRN2, TTR, OGN, ASPA, HMCN1, DDX11, PLOD2, CD46, ST3GAL6, ROBO4, CFH, COL12A1, AMY1, GBP6, GATM, RREB1, GBP9, MGP, COLEC12, SERPING1, RND3, ABCB1A, FNBP1L, TIAL1, RYR1, GBP4, FOLR1, CRB2, AGRN, B3GNT2, ENTPD1, ANGPTL2, B4GALT1, CPNE8, H2-Q4, PODXL, ITGA1, SPPL2A, LIN7C, ABHD14B, PCDH15, ITGA4, TINAGL1, ZFP4…	999	2674	19662	1.23655	0.695048	0.0674745	3.18055
P35_CB_DN	GOTERM_BP_DIRECT	GO:0008380~RNA splicing	25	2.12766	0.00194703	SRSF1, PRPF4B, SRSF10, PRPF39, GCFC2, PNN, SRSF2, SF3B1, SFSWAP, SNRNP48, SRSF5, CLASRP, SRSF6, SRRM2, TARDBP, SRSF9, ZRANB2, MAGOHB, RBM39, THOC2, PRPF40B, RBM25, LUC7L3, THOC1, PRPF40A	948	241	18082	1.97861	0.99797	0.379287	3.47062
P35_CB_DN	GOTERM_CC_DIRECT	GO:0042383~sarcolemma	15	1.2766	0.00262942	CLCN1, ABCC9, DES, PGM5, KCNJ8, RYR3, ITGA7, RYR1, COL6A1, NOS3, AGRN, AQP1, KCNJ11, AHNAK, CCDC78	999	118	19662	2.50191	0.754868	0.0751362	3.75423
P35_CB_DN	KEGG_PATHWAY	mmu04670:Leukocyte transendothelial migration	14	1.19149	0.00305616	ROCK1, SIPA1, CLDN5, ITGA4, CXCL12, CTNNA3, CDH5, PXN, MYL9, MAPK12, PECAM1, CLDN1, CLDN2, ESAM	357	118	7691	2.556	0.520304	0.0877355	3.87376
P35_CB_DN	GOTERM_MF_DIRECT	GO:0048407~platelet-derived growth factor binding	5	0.425532	0.00255708	COL4A1, PDGFB, COL3A1, COL6A1, COL5A1	907	12	17446	8.01452	0.908963	0.213096	3.93179
P35_CB_DN	GOTERM_BP_DIRECT	GO:0035987~endodermal cell differentiation	7	0.595745	0.0023295	COL7A1, ITGA7, COL12A1, COL6A1, VTN, ITGA4, COL8A1	948	27	18082	4.94507	0.9994	0.411344	4.13887
P35_CB_DN	GOTERM_BP_DIRECT	GO:0016477~cell migration	21	1.78723	0.00249857	PTPRK, TMEM18, NRP1, PODXL, RHBDF1, RPS6KB1, ITGA4, ENPEP, ELMO3, CD2AP, COL5A1, KDR, TYK2, HES1, LAMA5, VEGFA, ITGA7, NFATC2, EMP2, PRPF40A, MATK	948	191	18082	2.09712	0.99965	0.411705	4.43287
P35_CB_DN	GOTERM_MF_DIRECT	GO:0045296~cadherin binding	7	0.595745	0.0032774	CTNNAL1, PROM1, CD46, NOS3, CD2AP, CTNNA3, TBC1D2	907	29	17446	4.64289	0.953703	0.243713	5.01295
P35_CB_DN	GOTERM_BP_DIRECT	GO:0045765~regulation of angiogenesis	7	0.595745	0.00283535	ETS1, ID1, ENPP2, TEK, MAPK7, ADGRA2, EMP2	948	28	18082	4.76846	0.99988	0.431357	5.01597
P35_CB_DN	GOTERM_BP_DIRECT	GO:0055085~transmembrane transport	33	2.80851	0.00297624	SLC2A12, CLCN1, CLCN2, ABCA9, SLC16A11, SLC16A12, KCNA3, SFXN2, SLC47A1, TPCN2, SLC35B3, TRPV4, ABCD4, SLC22A6, SLC22A5, SLC12A7, TRPM7, SLC22A8, SLC24A5, ABCC10, ABCC12, ITPR3, ABCG2, ABCC9, SLC16A4, ABCB1A, RYR3, RYR1, MFSD10, CACNA1E, SLC13A4, ABCC5, ABCC6	948	364	18082	1.72922	0.999924	0.427497	5.25891
P35_CB_DN	GOTERM_BP_DIRECT	GO:0007519~skeletal muscle tissue development	10	0.851064	0.00300808	SRPK3, CCNT2, CAV1, COL19A1, ELN, TAZ, MEG3, DCN, GPCPD1, FLNB	948	58	18082	3.28859	0.999931	0.412803	5.31373
P35_CB_DN	GOTERM_BP_DIRECT	GO:0042384~cilium assembly	16	1.3617	0.00308626	SCLT1, CEP295, KIF24, CEP83, RPGR, DZIP1, NEK1, CELSR3, FLNA, TTLL3, TMEM67, MKS1, TRIM59, FNBP1L, LAMA5, FAM161A	948	129	18082	2.36575	0.999946	0.403994	5.44822
P35_CB_DN	GOTERM_BP_DIRECT	GO:0060271~cilium morphogenesis	19	1.61702	0.00355481	CEP295, SCLT1, KIF24, CEP83, RPGR, NEK1, DZIP1, CELSR3, WWTR1, FLNA, TTLL3, TMEM67, MKS1, NPHP3, TRIM59, FNBP1L, LAMA5, FAM161A, TBC1D32	948	170	18082	2.13178	0.999988	0.432435	6.25041
P35_CB_DN	GOTERM_BP_DIRECT	GO:0030336~negative regulation of cell migration	14	1.19149	0.00358159	RECK, PTPRK, ACVRL1, PDGFB, EGFL7, PLXNB3, SCAI, MIIP, EPHA1, ROBO4, TIE1, ARAP3, CHRD, ENG	948	106	18082	2.51919	0.999989	0.419288	6.29607
P35_CB_DN	GOTERM_BP_DIRECT	GO:0043129~surfactant homeostasis	5	0.425532	0.00365368	PLA2G4A, VEGFA, ADGRF5, CTSH, KDR	948	13	18082	7.33609	0.999991	0.410957	6.41886
P35_CB_DN	GOTERM_MF_DIRECT	GO:0004672~protein kinase activity	43	3.65957	0.00442375	GM14149, ACVRL1, PRPF4B, STK38, NEK1, MAP4K2, PINK1, RPS6KB2, RPS6KB1, CLK1, DDR2, DMPK, CLK4, MAP3K8, TEK, TIE1, YES1, CHUK, MATK, CDC7, SRPK3, LTK, SGK3, ROCK1, TRPM7, TGFBR2, PKN2, PRKCH, ATR, EPHA1, GTF2H2, KDR, TYK2, ACVR2A, CDC42BPG, MAPK12, EPHA8, ERN1, MAPK7, GRK3, LRRK1, MYLK, NRBP2	907	531	17446	1.55762	0.984233	0.292359	6.71011
P35_CB_DN	GOTERM_MF_DIRECT	GO:0008514~organic anion transmembrane transporter activity	6	0.510638	0.00469557	SLCO1A4, SLC22A8, MFSD10, SLCO1C1, SLC22A6, ABCC5	907	22	17446	5.24587	0.987789	0.28743	7.10835
P35_CB_DN	GOTERM_BP_DIRECT	GO:0032091~negative regulation of protein binding	10	0.851064	0.00426093	IFIT2, NES, CAV1, PDGFB, DDX11, ROCK1, CCM2L, ID1, TDG, DVL1	948	61	18082	3.12686	0.999999	0.445985	7.44721
P35_CB_DN	KEGG_PATHWAY	mmu05205:Proteoglycans in cancer	19	1.61702	0.00598468	CAV2, CAV1, ARHGEF1, ROCK1, LUM, IGF1, RPS6KB2, VTN, RPS6KB1, DCN, ITPR3, FLNB, PXN, FLNA, WNT2B, FZD6, KDR, MAPK12, VEGFA	357	203	7691	2.01638	0.763224	0.147917	7.45539
P35_CB_DN	GOTERM_BP_DIRECT	GO:0001569~patterning of blood vessels	8	0.680851	0.0043265	COL4A1, NRP1, VEGFA, TGFBR2, TEK, NOTCH4, ENG, CXCL12	948	40	18082	3.81477	0.999999	0.437118	7.5576
P35_CB_DN	GOTERM_MF_DIRECT	GO:0016787~hydrolase activity	103	8.76596	0.00506919	GLB1L, GNPDA1, MASP2, STYX, PTPN22, ENPEP, GPCPD1, RNF213, ASPA, DDX17, DDX11, PAPPA, PAN2, AMY1, PTPRK, ADAMTS20, DFFB, HDAC10, NEIL1, TATDN1, PNPLA3, TATDN3, DCLRE1C, ADAMTS8, ABCB1A, YME1L1, GBP3, IFIH1, ENPP1, ENPP2, ACP6, SSH3, PNPT1, DUSP11, HEXDC, BCHE, DUSP15, KATNA1, DDX3Y, ENTPD1, AGBL3, BMP1, PTPN2, SPPL2A, MALT1, ABHD14B, ATP11C, LACTB2, ATP13A5, ATP13A4, DNA2, PLA2G4A, MAN2C1, TDG, R…	907	1533	17446	1.29236	0.991407	0.288068	7.65313
P35_CB_DN	GOTERM_MF_DIRECT	GO:0008201~heparin binding	17	1.44681	0.00529967	FGFBP3, TNXB, NRP1, LTBP2, VTN, POSTN, COL5A3, PCOLCE, COL5A1, OGN, ADAMTS8, CLEC3B, VEGFA, RSPO2, CFH, SERPIND1, CHRD	907	151	17446	2.16551	0.993082	0.282211	7.98771
P35_CB_DN	GOTERM_CC_DIRECT	GO:0020005~symbiont-containing vacuole membrane	4	0.340426	0.0060238	GBP6, GBP9, AQP1, GBP3	999	8	19662	9.84084	0.960301	0.156177	8.4067
P35_CB_DN	GOTERM_MF_DIRECT	GO:0005178~integrin binding	13	1.10638	0.00560384	LAMA5, PTPN2, FBLN5, COL3A1, ITGA7, ERBIN, IGF1, VTN, COL16A1, CXADR, EMP2, PXN, KDR	907	100	17446	2.50053	0.994804	0.280175	8.42753
P35_CB_DN	GOTERM_CC_DIRECT	GO:0005912~adherens junction	9	0.765957	0.00625754	TMEM204, TRPV4, CDH1, ESAM, DLL1, WTIP, CXADR, CTNNA3, CDH5	999	55	19662	3.22064	0.964987	0.154309	8.71924
P35_CB_DN	GOTERM_MF_DIRECT	GO:0005509~calcium ion binding	53	4.51064	0.00582504	DNAH7B, EFCC1, LTBP2, MASP2, JAG2, HMCN1, CD93, AMY1, EGFL7, ADGRE5, SLC24A5, MGP, 1700109H08RIK, DLL1, LPCAT2, THBD, CAPN11, RYR3, RYR1, EGFL8, PROS1, ENPP1, ENPP2, CETN3, CABP7, CDH1, CDH5, MYL9, CALML4, PRRG1, RASGRP3, CRB2, EFCAB2, HEG1, AGRN, BMP1, CELSR3, PCDH15, NID2, ITPR3, NOTCH3, PLA2G4A, CLGN, SNED1, CLEC3B, FBLN5, NOTCH4, CDH19, DSC2, SYT16, SYTL2, CACNA1E, ADGRL4	907	699	17446	1.45844	0.995781	0.275054	8.74613
P35_CB_DN	GOTERM_CC_DIRECT	GO:0001725~stress fiber	10	0.851064	0.00653682	PGM5, SHROOM4, TEK, MYH11, MYH6, FLNB, FHOD1, PXN, MYLK, MYL9	999	67	19662	2.93756	0.969867	0.153604	9.09137
P35_CB_DN	GOTERM_BP_DIRECT	GO:0009612~response to mechanical stimulus	10	0.851064	0.00529976	CAV1, ETS1, COL3A1, TGFBR2, RPS6KB1, POSTN, DCN, IGFBP2, CXCL12, PIEZO2	948	63	18082	3.02759	1	0.491421	9.1817
P35_CB_DN	KEGG_PATHWAY	mmu04611:Platelet activation	14	1.19149	0.00744274	ARHGEF1, ROCK1, COL3A1, ITPR3, COL5A3, COL5A2, COL5A1, PLA2G4A, MAPK12, COL27A1, NOS3, COL11A2, PLA2G4B, MYLK	357	131	7691	2.30235	0.83353	0.16414	9.19233
P35_CB_DN	GOTERM_BP_DIRECT	GO:0030324~lung development	15	1.2766	0.00543384	TGFBR2, MGP, IGF1, CCDC39, KDR, HES1, NPHP3, FBXW7, LAMA5, VEGFA, AARD, HEG1, STRA6, NOS3, RIDA	948	124	18082	2.30732	1	0.48656	9.40331
P35_CB_DN	GOTERM_BP_DIRECT	GO:0007179~transforming growth factor beta receptor signaling pathway	11	0.93617	0.00557521	PTPRK, ACVRL1, GCNT2, PDGFB, DUSP15, COL3A1, TGFBR2, CLDN5, ENG, PXN, CDH5	948	75	18082	2.7975	1	0.482466	9.63642
P35_CB_UP	GOTERM_CC_DIRECT	GO:0043209~myelin sheath	21	5.91549	3.45026e-11	ALDOA, ASS1, EEF1A2, ATP1A3, HBA-A1, SLC25A12, NCAM1, YWHAG, SYN1, HSPA2, SYN2, UBC, HBB-B1, HSPA5, TUBA1B, SNAP25, DNM1, HSPA8, NSF, TUBB4A, SPTAN1	314	192	19662	6.84883	1.16619e-08	1.16619e-08	4.69437e-08
P35_CB_UP	GOTERM_CC_DIRECT	GO:0043025~neuronal cell body	32	9.01408	5.87926e-10	ASS1, SNCB, SYT5, SORL1, HCFC1, L1CAM, VGF, ARG1, RGS10, SEZ6L2, PDE1B, PTK2B, ROBO1, RARA, SNAP25, TUBB4A, TUBB3, HSPA8, NCDN, PTPRF, KCNB2, EEF1A2, MAP1B, ENC1, DPYSL5, BSN, SEZ6L, NCAM1, DNMT1, NRGN, MTOR, SST	314	534	19662	3.75238	1.98719e-07	9.93595e-08	7.99923e-07
P35_CB_UP	GOTERM_CC_DIRECT	GO:0005737~cytoplasm	154	43.3803	1.74232e-08	DLC1, ALDH1L1, SNCB, TUBB2A, ATP1B2, ATG101, FAM110B, RANGAP1, FOXO3, UBQLN2, CALB2, ROBO1, SND1, TRIM45, RARA, LSM2, DCTPP1, IRS2, PTPRM, ENC1, BSN, NR0B2, BASP1, CDKL5, FRY, JUP, NCAM1, RND1, SKOR2, MAGEE1, RASGRF2, TRAPPC9, CELF6, TRIM32, TUBA4A, CMIP, STMN1, TRP73, CLIP3, ERC1, EPS8L1, ALDOA, ASS1, CCDC92, SSH2, HSPA1A, CTIF, CORO2B, ARG1, PEG10, MEIS2, HEXIM2, DUSP14, UBASH3B, NUDC, HAP1, TU…	314	6631	19662	1.45425	5.88903e-06	1.96301e-06	2.37057e-05
P35_CB_UP	GOTERM_MF_DIRECT	GO:0005515~protein binding	111	31.2676	4.41689e-08	ALDH1L1, RAB9B, L1CAM, DLK1, UBQLN2, FOXO3, USP27X, ROBO1, SND1, RARA, LSM2, ISLR2, PHYHIP, IRS2, CRTAC1, BSN, BASP1, JUP, NCAM1, MAGEE1, TRAPPC9, TRIM32, STMN1, TRP73, CLIP3, ERC1, CHGB, SMARCA2, SMARCA4, TSHZ2, ASTN1, HSPA1A, HSPA1B, RIMS1, UBASH3B, DYRK3, HAP1, NUDC, CPNE4, CPNE6, NR4A2, NR4A1, CDKN1A, UBA1, DNMT1, MTOR, HSP90AB1, MLPH, HPS6, SORL1, TTLL1, SPRY4, HSPH1, HEATR5B, BAG3, TICAM1, …	295	4092	17446	1.60421	2.39393e-05	2.39393e-05	6.43261e-05
P35_CB_UP	GOTERM_CC_DIRECT	GO:0005634~nucleus	141	39.7183	8.24571e-08	DLC1, ALAD, TUBB2A, RANGAP1, FOXO3, UBQLN2, CALB2, SND1, TRIM45, RARA, LSM2, ENC1, EOMES, NR0B2, BASP1, CDKL5, JUP, RCL1, SKOR2, MAGEE1, CELF6, TRIM32, FBLL1, CMIP, TRP73, SMARCA2, SMARCA4, UNCX, ALDOA, TSHZ2, CAMTA2, ASS1, HSPA1A, ARG1, PEG10, MEIS2, HEXIM2, DUSP14, UBASH3B, DYRK3, NUDC, HAP1, TUBB4A, DHX8, KLF13, ESRRB, EEF1A2, FTO, NR4A2, NR4A1, NR4A3, SALL3, CDKN1A, ARMC7, UBA1, OTUB1, ETS2, …	314	6019	19662	1.46687	2.78701e-05	6.9676e-06	0.00011219
P35_CB_UP	GOTERM_CC_DIRECT	GO:0043005~neuron projection	24	6.76056	3.01318e-07	SGK1, NCDN, PTPRF, ASS1, SYT5, BSN, PRKCG, VGF, CALB2, ARG1, CDH13, FOS, GRM2, ATP2B4, BCL11B, TENM2, BAG3, TENM3, RARA, STMN1, SNAP25, SV2C, HSPA8, HAP1	314	420	19662	3.57816	0.00010184	2.03689e-05	0.000409967
P35_CB_UP	GOTERM_BP_DIRECT	GO:0071353~cellular response to interleukin-4	8	2.25352	2.46505e-07	HSP90AB1, ARG1, ALAD, XBP1, FASN, HSPA5, NFIL3, TUBA1B	307	27	18082	17.4516	0.000415767	0.000415767	0.000415394
P35_CB_UP	GOTERM_CC_DIRECT	GO:0030425~dendrite	26	7.32394	3.44932e-07	MLPH, HCFC1, L1CAM, RANGAP1, SYN1, PTK2B, RARA, NRG1, HAP1, GCHFR, TUBB3, HSPA8, NCDN, DLGAP2, KCNB2, CPNE6, GABRA5, MAP1B, DPYSL5, BSN, PRKCG, GRM2, MAGEE1, TENM2, NRGN, MTOR	314	490	19662	3.32258	0.00011658	1.9431e-05	0.000469308
P35_CB_UP	GOTERM_CC_DIRECT	GO:0005913~cell-cell adherens junction	20	5.6338	8.27634e-07	ALDOA, HSP90AB1, PTPRM, HCFC1, HSPA1A, RANGAP1, JUP, UBFD1, ATIC, BAG3, SND1, FASN, DNAJB1, HSPA5, RUVBL1, ERC1, NUDC, HSPA8, EPS8L1, SPTAN1	314	316	19662	3.96315	0.000279701	3.99621e-05	0.00112606
P35_CB_UP	GOTERM_MF_DIRECT	GO:0098641~cadherin binding involved in cell-cell adhesion	19	5.35211	1.29159e-06	ALDOA, HSP90AB1, HCFC1, HSPA1A, RANGAP1, JUP, UBFD1, ATIC, BAG3, SND1, FASN, DNAJB1, HSPA5, RUVBL1, ERC1, NUDC, HSPA8, EPS8L1, SPTAN1	295	279	17446	4.02739	0.000699797	0.00034996	0.00188101
P35_CB_UP	GOTERM_CC_DIRECT	GO:0005829~cytosol	55	15.493	3.12079e-06	DLC1, HSP90AB1, ALAD, RAB9B, RANGAP1, FOXO3, CALB2, HSPH1, FOS, GBF1, BAG3, MT2, TUBB5, MT1, RAB6B, DPP9, TUBA1B, DCTPP1, PPP2R1A, SYNRG, IRS2, PRKCG, JUP, RND1, ITGB1BP1, VSNL1, UBC, TRP73, STMN1, RAB3A, RAB3B, NDN, HK1, HSPA1A, ZBTB16, RGS10, HSPA2, SYN1, XBP1, PER1, SNAP25, GCHFR, HSPA8, AMD2, TXNIP, NCDN, MAP1B, GM10260, DPYSL3, CDKN1A, YWHAG, UBA1, DNAJB1, MTOR, CRYM	314	1784	19662	1.93048	0.00105427	0.000131845	0.00424602
P35_CB_UP	GOTERM_BP_DIRECT	GO:0007017~microtubule-based process	8	2.25352	5.09375e-06	TUBB2A, MAP1B, TUBB5, TUBA4A, TUBA1B, TUBB4A, TUBB3, TUBA1C	307	41	18082	11.4925	0.00855636	0.00428737	0.00858335
P35_CB_UP	GOTERM_CC_DIRECT	GO:0030424~axon	20	5.6338	8.35323e-06	RAB3A, DNM3, CPNE6, MAP1B, ATP1A3, KCNA4, BSN, HCFC1, L1CAM, NCAM1, GRM2, SYN1, PTK2B, ROBO1, TENM3, NRGN, NRG1, SNAP25, HSPA8, TUBB3	314	370	19662	3.38475	0.00281942	0.000313662	0.0113647
P35_CB_UP	GOTERM_CC_DIRECT	GO:0045202~synapse	23	6.47887	2.15725e-05	DNM3, SNCB, DLGAP2, SYT5, MAP1B, GABRA5, ATP1A3, BSN, PRKCG, RIMS1, CALB2, GRM2, SYN1, TENM2, SYN2, DOC2G, NRGN, ERC1, NRG1, SNAP25, SV2C, DNM1, HAP1	314	505	19662	2.8519	0.00726506	0.000728892	0.0293472
P35_CB_UP	GOTERM_BP_DIRECT	GO:0006351~transcription, DNA-templated	57	16.0563	1.99933e-05	FOSL2, FOXO3, SND1, RARA, BRD4, NFIL3, KDM5B, EGR1, ZCCHC12, EGR4, EOMES, TLE3, NR0B2, IRF2BP1, NPAS4, SKOR2, NAB2, ITGB1BP1, ZMIZ1, NAB1, RUVBL1, TRP73, SMARCA2, UNCX, SMARCA4, CAMTA2, TSHZ2, NDN, POLR2A, MEIS2, HEXIM2, ZSCAN22, XBP1, BCL11B, GATAD2B, PER1, BCL6, BCAS3, NAT14, HSPA8, TXNIP, ESRRB, KLF13, NR4A2, NR4A1, LMX1A, NR4A3, SALL3, RASL11A, BCORL1, TENM2, ETS2, JAZF1, NELFA, DNMT1, RBM14,…	307	1885	18082	1.78103	0.0331666	0.01118	0.0336862
P35_CB_UP	GOTERM_MF_DIRECT	GO:0005525~GTP binding	20	5.6338	2.87004e-05	HSP90AB1, RAB3A, DNM3, RAB3B, RAB9B, TUBB2A, EEF1A2, RHOV, RND1, RASL11A, DIRAS2, REM2, TUBB5, TUBA4A, RAB6B, TUBA1B, DNM1, TUBA1C, TUBB3, TUBB4A	295	383	17446	3.0882	0.0154355	0.00517186	0.0417901
P35_CB_UP	GOTERM_CC_DIRECT	GO:0005856~cytoskeleton	37	10.4225	4.32158e-05	TRIOBP, MAD1L1, TUBB2A, CCDC92, FAM110B, SSH2, RANGAP1, TTLL1, CORO2B, HSPA2, PTK2B, TUBB5, DYNC1H1, BCAS3, TUBA1B, TUBB3, TUBA1C, TUBB4A, HAP1, NUDC, DNM3, ARHGEF18, DRC1, ENC1, CCNF, MAP1B, BSN, CHAMP1, ARHGAP26, FRY, JUP, RND1, ITGB1BP1, TUBA4A, STMN1, DNM1, SPTAN1	314	1113	19662	2.08164	0.0145011	0.00132705	0.0587827
P35_CB_UP	GOTERM_CC_DIRECT	GO:0048471~perinuclear region of cytoplasm	27	7.60563	4.94195e-05	PACS1, RAB3B, MLPH, SYT5, SORL1, HSPA1A, RANGAP1, CTIF, MEIS2, PTK2B, MT2, MT1, RARA, SNAP25, HSPA8, HAP1, DNM3, SGK1, PTPRM, MAP1B, PRKCG, MCM3, CDH13, CDKN1A, MAGEE1, ITGB1BP1, RBM14	314	692	19662	2.44318	0.0165654	0.00139105	0.0672184
P35_CB_UP	GOTERM_CC_DIRECT	GO:0030426~growth cone	12	3.38028	4.98983e-05	GPRIN1, NCAM1, SNCB, PTPRF, PTK2B, CRTAC1, TENM2, MAP1B, DPYSL3, BASP1, SNAP25, HAP1	314	159	19662	4.72587	0.0167246	0.00129655	0.0678695
P35_CB_UP	GOTERM_MF_DIRECT	GO:0003924~GTPase activity	14	3.94366	5.70525e-05	RAB3A, DNM3, RAB3B, TUBB2A, EEF1A2, REM2, TUBB5, TUBA4A, GNG4, TUBA1B, DNM1, TUBA1C, TUBB3, TUBB4A	295	209	17446	3.96146	0.0304501	0.00770103	0.0830572
P35_CB_UP	GOTERM_BP_DIRECT	GO:0048666~neuron development	8	2.25352	5.32789e-05	NCAM1, NDN, XBP1, TENM2, DGKG, GABRA5, DPYSL3, TRP73	307	58	18082	8.124	0.0859628	0.0222204	0.0897447
P35_CB_UP	GOTERM_MF_DIRECT	GO:0000166~nucleotide binding	56	15.7746	6.9903e-05	HSP90AB1, RAB9B, TUBB2A, RHOV, TTLL1, TTLL12, HSPH1, ATP2B4, DIRAS2, TUBB5, RAB6B, DYNC1H1, TUBA1B, SIK3, NSF, TUBA1C, TUBB3, DCTPP1, SGK1, PRKCG, MCM3, CDKL5, RND1, CELF6, REM2, TUBA4A, RUVBL1, SMARCA2, SMARCA4, RAB3A, RAB3B, ASS1, HK1, EPHB6, HSPA2, PTK2B, DGKG, DYRK3, HSPA5, HSPA8, TUBB4A, DCAKD, DHX8, PDK2, DNM3, EEF1A2, PDK4, ATP1A3, LARS2, HYOU1, RASL11A, UBA1, PRKAR1B, MTOR, RBM14, DNM1	295	1936	17446	1.71063	0.0371799	0.00754911	0.101756
P35_CB_UP	GOTERM_MF_DIRECT	GO:0043565~sequence-specific DNA binding	26	7.32394	7.48014e-05	CAMTA2, FOSL2, FOXO3, FOS, MEIS2, ZSCAN22, XBP1, BCL11B, GATAD2B, BCL6, RARA, NFIL3, TLX3, ETV5, EGR1, ESRRB, NR4A2, EOMES, NR4A1, FOSB, LMX1A, NR4A3, SALL3, ETS2, TRP73, UNCX	295	633	17446	2.42909	0.039733	0.00673453	0.108883
P35_CB_UP	GOTERM_BP_DIRECT	GO:0045944~positive regulation of transcription from RNA polymerase II promoter	35	9.85915	7.94728e-05	CAMTA2, FOSL2, NDN, FOXO3, FOS, HSPH1, MEIS2, XBP1, BCL11B, PER1, RARA, BRD4, NRG1, BCAS3, ETV5, EGR1, ESRRB, KLF13, EGR4, NR4A2, EOMES, NR4A1, NR4A3, LMX1A, FOSB, NPAS4, CDH13, ETS2, ITGB1BP1, ZMIZ1, NELFA, TRP73, RBM14, SMARCA2, SMARCA4	307	995	18082	2.07182	0.125476	0.0264588	0.133839
P35_CB_UP	GOTERM_MF_DIRECT	GO:0000977~RNA polymerase II regulatory region sequence-specific DNA binding	14	3.94366	9.95688e-05	EGR1, FOSL2, EGR4, EOMES, NR4A2, LMX1A, XBP1, ETS2, GATAD2B, BCL6, RARA, NFIL3, ETV5, SMARCA4	295	221	17446	3.74636	0.0525385	0.00768021	0.144911
P35_CB_UP	KEGG_PATHWAY	mmu04721:Synaptic vesicle cycle	8	2.25352	0.000121535	DNM3, RAB3A, AP2B1, RIMS1, STX1B, SNAP25, DNM1, NSF	141	62	7691	7.03821	0.0223533	0.0223533	0.150416
P35_CB_UP	GOTERM_BP_DIRECT	GO:0008285~negative regulation of cell proliferation	19	5.35211	0.000102729	DLC1, PTPRF, NDN, KLF13, HSPA1A, ZBTB16, SLIT3, CDH13, CDKN1A, PTK2B, ROBO1, BCL11B, ITGB1BP1, BCL6, RARA, LDOC1, SMARCA2, TOB2, F2R	307	384	18082	2.91427	0.159126	0.0284723	0.172972
P35_CB_UP	GOTERM_CC_DIRECT	GO:0008021~synaptic vesicle	10	2.8169	0.000188998	RAB3A, RAB3B, SYN1, SYN2, SV2C, STX1B, SNAP25, HAP1, DNM1, HSPA8	314	126	19662	4.96967	0.0618894	0.00455299	0.256842
P35_CB_UP	GOTERM_CC_DIRECT	GO:0005874~microtubule	16	4.50704	0.000256115	DNM3, TUBB2A, MAP1B, TTLL1, HSPH1, TUBB5, TUBA4A, STMN1, DYNC1H1, TUBA1B, DNM1, NUDC, TUBA1C, HSPA8, TUBB3, TUBB4A	314	327	19662	3.06387	0.0829358	0.00575523	0.347903
P35_CB_UP	GOTERM_MF_DIRECT	GO:0008134~transcription factor binding	17	4.78873	0.000242371	EGR1, CAMTA2, ESRRB, NR4A1, IRF2BP1, NR0B2, TRIB1, FOS, MEIS2, NAB2, NAB1, PER1, RARA, TRP73, BCAS3, HSPA8, SMARCA4	295	342	17446	2.93966	0.123116	0.0162885	0.352401
P35_CB_UP	GOTERM_MF_DIRECT	GO:0051082~unfolded protein binding	8	2.25352	0.000267932	HSP90AB1, HSPA2, SCG5, HSPA1A, DNAJB1, HSPA5, HSPA8, NUDC	295	75	17446	6.30816	0.135184	0.0160081	0.389499
P35_CB_UP	KEGG_PATHWAY	mmu04961:Endocrine and other factor-regulated calcium reabsorption	7	1.97183	0.000334173	DNM3, KLK1B22, AP2B1, ATP1B2, ATP1A3, PRKCG, DNM1	141	52	7691	7.34274	0.0602736	0.0306052	0.413084
P35_CB_UP	GOTERM_BP_DIRECT	GO:0006355~regulation of transcription, DNA-templated	61	17.1831	0.000301711	FOSL2, FOXO3, FOS, USP27X, SND1, RARA, BRD4, NFIL3, KDM5B, EGR1, ZCCHC12, EGR4, EOMES, TLE3, NR0B2, IRF2BP1, NPAS4, FOSB, SKOR2, NAB2, ITGB1BP1, ZMIZ1, NAB1, RUVBL1, TRP73, SMARCA2, UNCX, SMARCA4, CAMTA2, TSHZ2, NDN, HCFC1, ZBTB16, MEIS2, HEXIM2, XBP1, BCL11B, GATAD2B, PER1, BCL6, TLX3, BCAS3, ETV5, NAT14, HSPA8, TXNIP, ESRRB, KLF13, NR4A2, NR4A1, LMX1A, NR4A3, SALL3, RASL11A, BCORL1, TENM2, ETS2…	307	2279	18082	1.5765	0.398942	0.070142	0.507212
P35_CB_UP	GOTERM_MF_DIRECT	GO:0019904~protein domain specific binding	15	4.22535	0.000414319	IRS2, DLGAP2, ZBTB16, NR0B2, BASP1, TNNI3, STX1B, YWHAG, TUBB5, DNMT1, RARA, HSPA5, MTOR, SNAP25, HAP1	295	289	17446	3.0695	0.20117	0.0222104	0.601708
P35_CB_UP	GOTERM_CC_DIRECT	GO:0042995~cell projection	25	7.04225	0.000477267	GPRIN1, NDN, KCNA4, L1CAM, ATP2B4, PTK2B, ROBO1, CNTNAP2, HAP1, TUBB4A, NCDN, KCNB2, CPNE6, MAP1B, DRC1, PRKCG, DPYSL3, BASP1, ARHGAP31, GRM2, ITGB1BP1, TENM2, TENM3, GAMT, NRGN	314	712	19662	2.19866	0.14901	0.010034	0.647413
P35_CB_UP	GOTERM_BP_DIRECT	GO:0043524~negative regulation of neuron apoptotic process	11	3.09859	0.00040505	HSP90AB1, HSPH1, SNCB, PTK2B, GABRA5, NR4A2, MT1, PRKCG, NR4A3, TRP73, F2R	307	160	18082	4.04931	0.495132	0.0818846	0.68038
P35_CB_UP	GOTERM_BP_DIRECT	GO:0007156~homophilic cell adhesion via plasma membrane adhesion molecules	11	3.09859	0.000469114	CDH13, PTPRM, PTPRF, ROBO1, PCDH20, PCDHGA9, TENM3, PCDHGB7, PCDHGB6, L1CAM, PCDHGA2	307	163	18082	3.97478	0.546872	0.0841965	0.787592
P35_CB_UP	GOTERM_BP_DIRECT	GO:0035335~peptidyl-tyrosine dephosphorylation	5	1.40845	0.000654023	DUSP5, DUSP4, PTPRF, DUSP14, UBASH3B	307	24	18082	12.2706	0.668358	0.104497	1.09643
P35_CB_UP	KEGG_PATHWAY	mmu04540:Gap junction	8	2.25352	0.00092416	TUBB2A, TUBB5, TUBA4A, PRKCG, TUBA1B, TUBB4A, TUBB3, TUBA1C	141	86	7691	5.07406	0.157998	0.0557123	1.13856
P35_CB_UP	KEGG_PATHWAY	mmu04141:Protein processing in endoplasmic reticulum	11	3.09859	0.000943003	HSP90AB1, HYOU1, HSPH1, HSPA2, XBP1, HSPA1A, DNAJB1, HSPA1B, UBQLN2, HSPA5, HSPA8	141	168	7691	3.57147	0.160947	0.0429219	1.16165
P35_CB_UP	GOTERM_BP_DIRECT	GO:0007264~small GTPase mediated signal transduction	13	3.66197	0.000718948	ARHGAP31, RAB3A, RAB3B, DIRAS2, RASL11A, RND1, RAB9B, RASGRF2, ARHGEF18, REM2, RAB6B, RHOV, RAPGEFL1	307	236	18082	3.24444	0.702785	0.104435	1.20465
P35_CB_UP	GOTERM_BP_DIRECT	GO:0017157~regulation of exocytosis	5	1.40845	0.000768305	RAB3A, RAB3B, STX1B, HAP1, NSF	307	25	18082	11.7798	0.726548	0.102419	1.28685
P35_CB_UP	GOTERM_BP_DIRECT	GO:0010035~response to inorganic substance	4	1.12676	0.00094269	ATIC, EEF1A2, NR4A2, NR4A1	307	12	18082	19.633	0.796292	0.115197	1.57675
P35_CB_UP	GOTERM_BP_DIRECT	GO:0007411~axon guidance	10	2.8169	0.000998078	NCAM1, ROBO1, TENM2, DPYSL5, L1CAM, NR4A3, LMX1A, NCAN, TUBB3, SLIT3	307	149	18082	3.95295	0.814481	0.113371	1.66866
P35_CB_UP	GOTERM_MF_DIRECT	GO:0032403~protein complex binding	16	4.50704	0.00115878	PDK2, ALDH1L1, PTPRF, ATG101, MAP1B, HK1, NR0B2, CDKN1A, PTK2B, BAG3, ITGB1BP1, TUBB5, DNM1, NSF, SMARCA4, SPTAN1	295	358	17446	2.64308	0.466568	0.0555282	1.67441
P35_CB_UP	GOTERM_MF_DIRECT	GO:0000978~RNA polymerase II core promoter proximal region sequence-specific DNA binding	16	4.50704	0.0011878	FOSL2, NDN, KLF13, NR4A2, FOSB, NPAS4, NR4A3, FOS, MEIS2, SKOR2, BCL11B, ETS2, PER1, GATAD2B, TRP73, SMARCA4	295	359	17446	2.63572	0.474902	0.0522655	1.71601
P35_CB_UP	GOTERM_BP_DIRECT	GO:0048791~calcium ion-regulated exocytosis of neurotransmitter	5	1.40845	0.00119494	SYT5, DOC2G, RIMS1, STX1B, SNAP25	307	28	18082	10.5177	0.866955	0.125822	1.99469
P35_CB_UP	GOTERM_BP_DIRECT	GO:0007269~neurotransmitter secretion	5	1.40845	0.00119494	GRM2, SYN1, SYN2, RIMS1, SNAP25	307	28	18082	10.5177	0.866955	0.125822	1.99469
P35_CB_UP	GOTERM_MF_DIRECT	GO:0003714~transcription corepressor activity	10	2.8169	0.00139578	SKOR2, JAZF1, RARA, BASP1, NR0B2, IRF2BP1, KDM5B, CRYM, TOB2, SMARCA4	295	157	17446	3.76681	0.530949	0.0565709	2.01364
P35_CB_UP	GOTERM_CC_DIRECT	GO:0005925~focal adhesion	16	4.50704	0.00158638	DLC1, TRIOBP, SSH2, HSPA1A, L1CAM, SPRY4, ARHGAP26, JUP, CDH13, ARHGAP31, HYOU1, YWHAG, PTK2B, FBLN7, HSPA5, HSPA8	314	391	19662	2.56237	0.415279	0.031073	2.13695
P35_CB_UP	GOTERM_CC_DIRECT	GO:0014069~postsynaptic density	12	3.38028	0.00162615	DNM3, SYN1, DLGAP2, PTK2B, SYN2, MAP1B, BSN, PRKCG, NRGN, RIMS1, NSF, HSPA8	314	239	19662	3.14399	0.423099	0.030098	2.18997
P35_CB_UP	GOTERM_BP_DIRECT	GO:0000122~negative regulation of transcription from RNA polymerase II promoter	25	7.04225	0.0015166	TXNIP, EGR1, EOMES, NR4A2, HCFC1, ZBTB16, FOXO3, NR0B2, IRF2BP1, NR4A3, SKOR2, HEXIM2, XBP1, TENM2, ETS2, JAZF1, PER1, GATAD2B, DNMT1, BCL6, RARA, TRP73, NFIL3, CRYM, SMARCA4	307	729	18082	2.01986	0.92273	0.14788	2.5252
P35_CB_UP	GOTERM_BP_DIRECT	GO:0071376~cellular response to corticotropin-releasing hormone stimulus	3	0.84507	0.00167463	NR4A2, NR4A1, NR4A3	307	4	18082	44.1743	0.940838	0.153226	2.78484
P35_CB_UP	GOTERM_MF_DIRECT	GO:0005200~structural constituent of cytoskeleton	7	1.97183	0.00202399	TUBB2A, TUBB5, TUBA4A, TUBA1B, TUBB4A, TUBB3, TUBA1C	295	78	17446	5.30734	0.6665	0.0754394	2.90755
P35_CB_UP	GOTERM_CC_DIRECT	GO:0043195~terminal bouton	8	2.25352	0.00222046	RAB3A, SYN1, SNCB, SYN2, L1CAM, SNAP25, CALB2, HSPA8	314	113	19662	4.43312	0.528271	0.0387731	2.9792
P35_CB_UP	GOTERM_MF_DIRECT	GO:0001077~transcriptional activator activity, RNA polymerase II core promoter proximal region sequence-specific binding	13	3.66197	0.00218801	EGR1, FOS, CAMTA2, MEIS2, NDN, KLF13, BCL11B, NR4A2, NR4A1, FOSB, NR4A3, NPAS4, TRP73	295	270	17446	2.84743	0.694926	0.0760957	3.13969
P35_CB_UP	GOTERM_BP_DIRECT	GO:0043401~steroid hormone mediated signaling pathway	6	1.69014	0.00198373	ESRRB, NR4A2, NR4A1, RARA, NR4A3, NR0B2	307	53	18082	6.66781	0.964911	0.169813	3.29082
P35_CB_UP	GOTERM_BP_DIRECT	GO:0007399~nervous system development	16	4.50704	0.00200844	PTPRF, ENC1, MAP1B, DPYSL5, NR4A2, DPYSL3, L1CAM, SLIT3, FOS, ROBO1, STMN1, NRG1, SMARCA2, UNCX, SMARCA4, ISLR2	307	377	18082	2.49969	0.966347	0.163482	3.33116
P35_CB_UP	GOTERM_MF_DIRECT	GO:0003707~steroid hormone receptor activity	6	1.69014	0.0024866	ESRRB, NR4A2, NR4A1, RARA, NR4A3, NR0B2	295	56	17446	6.33632	0.740608	0.0808799	3.56096
P35_CB_UP	GOTERM_CC_DIRECT	GO:0043234~protein complex	21	5.91549	0.00269912	ALDOA, KLK1B22, RAB3A, IRS2, ALDH1L1, DPYSL5, HK1, HSPA1A, NR0B2, CDKN1A, ATP2B4, TUBB5, GATAD2B, DNMT1, RUVBL1, DNM1, HSPA8, EPS8L1, GCHFR, SPTAN1, SMARCA4	314	628	19662	2.09391	0.598896	0.0446492	3.61054
P35_CB_UP	GOTERM_CC_DIRECT	GO:0030054~cell junction	23	6.47887	0.00270205	DLC1, DLGAP2, SYT5, MAP1B, GABRA5, SSH2, BSN, PRKCG, BASP1, RIMS1, ARHGAP26, JUP, ARHGAP31, GRM2, SYN1, PTK2B, TENM2, SYN2, TRP73, NRGN, SNAP25, SV2C, HAP1	314	718	19662	2.00586	0.599294	0.0426143	3.6144
P35_CB_UP	GOTERM_BP_DIRECT	GO:0006366~transcription from RNA polymerase II promoter	9	2.53521	0.00243893	EGR1, SALL3, FOS, FOSL2, KLF13, XBP1, FOSB, NFIL3, POLR2A	307	138	18082	3.84124	0.983747	0.186147	4.03145
P35_CB_UP	GOTERM_BP_DIRECT	GO:0007616~long-term memory	5	1.40845	0.00249956	EGR1, SGK1, NPAS4, MTOR, SNAP25	307	34	18082	8.66162	0.985331	0.182128	4.12969
P35_CB_UP	GOTERM_MF_DIRECT	GO:0019901~protein kinase binding	17	4.78873	0.00293466	HSP90AB1, IRS2, EEF1A2, FOXO3, NR4A3, TNNI3, STX1B, RIMS1, JUP, SYN1, ITGB1BP1, TICAM1, MTOR, TRP73, LSM2, DNM1, NSF	295	434	17446	2.3165	0.79667	0.0894454	4.18991
P35_CB_UP	GOTERM_CC_DIRECT	GO:0016234~inclusion body	4	1.12676	0.00320461	HSP90AB1, SNCB, HSPA1A, HAP1	314	19	19662	13.1827	0.662064	0.0481174	4.27316
P35_CB_UP	GOTERM_MF_DIRECT	GO:0035259~glucocorticoid receptor binding	4	1.12676	0.0032042	ETS2, NR4A2, NR4A1, NR4A3	295	18	17446	13.142	0.824385	0.0921144	4.56643
P35_CB_UP	GOTERM_BP_DIRECT	GO:0009791~post-embryonic development	8	2.25352	0.00326699	RAB3A, NDN, BCL11B, NR4A2, DLK1, TRP73, MTOR, KDM5B	307	114	18082	4.13326	0.995996	0.221922	5.36507
P35_CB_UP	GOTERM_MF_DIRECT	GO:0031489~myosin V binding	4	1.12676	0.00436653	RAB3A, RAB3B, MLPH, RAB6B	295	20	17446	11.8278	0.906692	0.117357	6.17436
P35_CB_UP	GOTERM_BP_DIRECT	GO:0007155~cell adhesion	18	5.07042	0.00383115	PTPRM, PTPRF, ICAM5, ATP1B2, PCDH20, ASTN1, L1CAM, JUP, NCAM1, CDH13, PTK2B, TENM2, TNR, ITGB1BP1, TENM3, FBLN7, CNTNAP2, NCAN	307	485	18082	2.18594	0.998459	0.245384	6.26367
P35_CB_UP	GOTERM_MF_DIRECT	GO:0005524~ATP binding	40	11.2676	0.00470637	HSP90AB1, ASS1, HK1, HSPA1A, HSPA1B, TTLL1, TTLL12, TRIB1, CAMKV, HSPH1, EPHB6, ATP2B4, HSPA2, SYN1, PTK2B, DGKG, SYN2, DYRK3, HSPA5, DYNC1H1, SIK3, NSF, HSPA8, DCAKD, DHX8, PDK2, SGK1, PDK4, ATP1A3, PRKCG, DGKH, LARS2, MCM3, CDKL5, HYOU1, UBA1, MTOR, RUVBL1, SMARCA2, SMARCA4	295	1507	17446	1.56971	0.922453	0.120009	6.63968
P35_CB_UP	KEGG_PATHWAY	mmu04010:MAPK signaling pathway	12	3.38028	0.00594325	DUSP5, FOS, DUSP4, HSPA2, RASGRF2, NR4A1, CACNG3, HSPA1A, PRKCG, STMN1, HSPA1B, HSPA8	141	251	7691	2.60778	0.670027	0.198883	7.11669
P35_CB_UP	GOTERM_CC_DIRECT	GO:0042470~melanosome	7	1.97183	0.00555466	HSP90AB1, MLPH, SND1, FASN, HSPA5, GCHFR, HSPA8	314	101	19662	4.33985	0.847823	0.0785963	7.29859
P35_CB_UP	GOTERM_BP_DIRECT	GO:0045773~positive regulation of axon extension	5	1.40845	0.00455026	MAP1B, L1CAM, NRG1, CDKL5, ISLR2	307	40	18082	7.36238	0.999544	0.274269	7.39744
P35_CB_UP	GOTERM_BP_DIRECT	GO:0098609~cell-cell adhesion	10	2.8169	0.00499483	ALDOA, UBFD1, ATIC, BAG3, SND1, HCFC1, HSPA1A, DNAJB1, ERC1, NUDC	307	189	18082	3.11635	0.999786	0.28673	8.09189
P35_CB_UP	GOTERM_MF_DIRECT	GO:0004725~protein tyrosine phosphatase activity	7	1.97183	0.0059769	DUSP5, DUSP4, PTPRM, PTPRF, DUSP14, UBASH3B, SSH2	295	97	17446	4.26776	0.961195	0.143348	8.3604
P35_CB_UP	GOTERM_BP_DIRECT	GO:0042493~response to drug	14	3.94366	0.00530653	TXNIP, ALAD, PTPRM, ATP1A3, FOSB, NCAM1, FOS, ARG1, CDKN1A, PTK2B, XBP1, DNMT1, TRP73, SST	307	339	18082	2.43241	0.999874	0.291942	8.57586
P35_CB_UP	GOTERM_BP_DIRECT	GO:0048167~regulation of synaptic plasticity	5	1.40845	0.00542793	NCAM1, YWHAG, RARA, NPAS4, VGF	307	42	18082	7.01179	0.999897	0.288279	8.76371
P35_CB_UP	GOTERM_BP_DIRECT	GO:0008344~adult locomotory behavior	6	1.69014	0.00624277	SEZ6L2, GRM2, NR4A2, ATP1A3, SEZ6L, DNM1	307	69	18082	5.12165	0.999974	0.314294	10.0152
P35_CB_UP	KEGG_PATHWAY	mmu04915:Estrogen signaling pathway	7	1.97183	0.00874373	HSP90AB1, FOS, HSPA2, HBEGF, HSPA1A, HSPA1B, HSPA8	141	98	7691	3.89615	0.804752	0.238334	10.306
P35_CB_UP	GOTERM_CC_DIRECT	GO:0044327~dendritic spine head	3	0.84507	0.00844625	DNM3, ATP1A3, NRGN	314	9	19662	20.8726	0.943128	0.112597	10.8996
P35_CB_UP	GOTERM_BP_DIRECT	GO:0045429~positive regulation of nitric oxide biosynthetic process	5	1.40845	0.00694561	HSP90AB1, ASS1, PTK2B, TICAM1, MTOR	307	45	18082	6.54434	0.999992	0.333325	11.0817
P35_CB_UP	GOTERM_MF_DIRECT	GO:0003690~double-stranded DNA binding	8	2.25352	0.00828762	EGR1, FOS, FOSL2, TDP1, DNMT1, ZBTB16, FOSB, TRP73	295	136	17446	3.47876	0.989008	0.185375	11.4144
P35_CB_UP	KEGG_PATHWAY	mmu05202:Transcriptional misregulation in cancer	9	2.53521	0.0103184	JUP, CDKN1A, BAIAP3, BCL6, RARA, ZBTB16, NR4A3, TLX3, ETV5	141	165	7691	2.97524	0.854734	0.240882	12.0548
P35_CB_UP	KEGG_PATHWAY	mmu03040:Spliceosome	8	2.25352	0.010577	DHX8, HSPA2, PRPF8, HSPA1A, LSM2, HSPA1B, HSPA8, SF3B3	141	133	7691	3.28097	0.861627	0.219035	12.339
P35_CB_UP	GOTERM_MF_DIRECT	GO:0031625~ubiquitin protein ligase binding	12	3.38028	0.00905156	TXNIP, TRIOBP, CDKN1A, TUBB5, PER1, HSPA1A, RANGAP1, HSPA5, TUBA1B, HSPA8, POLR2A, TRIB1	295	284	17446	2.49883	0.992761	0.192872	12.4031
P35_CB_UP	GOTERM_BP_DIRECT	GO:0021766~hippocampus development	6	1.69014	0.00790149	ATP2B4, RARA, NR4A3, TRP73, LMX1A, OGDH	307	73	18082	4.84102	0.999998	0.359875	12.513
P35_CB_UP	GOTERM_MF_DIRECT	GO:0042623~ATPase activity, coupled	3	0.84507	0.00942271	HSPA1A, NSF, HSPA8	295	9	17446	19.713	0.994091	0.192494	12.8797
P35_CB_UP	GOTERM_BP_DIRECT	GO:0010906~regulation of glucose metabolic process	4	1.12676	0.0083781	PDK2, PDK4, SIK3, IGFBP5	307	25	18082	9.42384	0.999999	0.367358	13.2186
P35_CB_UP	GOTERM_MF_DIRECT	GO:0030742~GTP-dependent protein binding	4	1.12676	0.0102734	RAB3A, RAB3B, HPS6, GCHFR	295	27	17446	8.76133	0.996291	0.200589	13.963
P35_CB_UP	GOTERM_BP_DIRECT	GO:0060291~long-term synaptic potentiation	5	1.40845	0.00937138	RASGRF2, PTK2B, TNR, RIMS1, SNAP25	307	49	18082	6.0101	1	0.391268	14.6718
P35_CB_UP	GOTERM_BP_DIRECT	GO:0031175~neuron projection development	8	2.25352	0.00950215	GPRIN1, NCAM1, PTPRM, NCDN, PTK2B, CNTNAP2, L1CAM, FRY	307	139	18082	3.38987	1	0.386199	14.8615
P35_CB_UP	GOTERM_CC_DIRECT	GO:0048786~presynaptic active zone	4	1.12676	0.0118054	SYN1, BSN, ERC1, RIMS1	314	30	19662	8.34904	0.981938	0.148332	14.9199
P35_CB_UP	GOTERM_MF_DIRECT	GO:0042826~histone deacetylase binding	7	1.97183	0.0117575	HSP90AB1, CAMTA2, SKOR2, XBP1, DNMT1, RARA, HSPA1A	295	112	17446	3.69619	0.998356	0.218508	15.8229
P35_CB_UP	GOTERM_BP_DIRECT	GO:0051591~response to cAMP	5	1.40845	0.0107671	FOS, PTK2B, PER1, FOSB, VGF	307	51	18082	5.77441	1	0.415581	16.6753
P35_CB_UP	GOTERM_MF_DIRECT	GO:0003682~chromatin binding	16	4.50704	0.0129206	TSHZ2, CAMTA2, FOSL2, EOMES, HCFC1, FOS, SKOR2, NELFA, DNMT1, BCL6, BRD4, TRP73, BCAS3, SMARCA2, PHF8, SMARCA4	295	466	17446	2.03052	0.999131	0.229765	17.2542
P35_CB_UP	GOTERM_MF_DIRECT	GO:0004712~protein serine/threonine/tyrosine kinase activity	4	1.12676	0.0137421	SGK1, PDK4, DYRK3, PRKCG	295	30	17446	7.8852	0.999447	0.234979	18.2515
P35_CB_UP	GOTERM_BP_DIRECT	GO:0000902~cell morphogenesis	6	1.69014	0.0120917	TENM2, TENM3, BCL6, NRG1, SMARCA4, FRY	307	81	18082	4.36289	1	0.443658	18.5356
P35_CB_UP	GOTERM_CC_DIRECT	GO:0034663~endoplasmic reticulum chaperone complex	3	0.84507	0.015005	HYOU1, SDF2L1, HSPA5	314	12	19662	15.6545	0.993965	0.178435	18.5925
P35_CB_UP	GOTERM_CC_DIRECT	GO:0005794~Golgi apparatus	30	8.4507	0.0150469	GLG1, PACS1, SNCB, NSG2, SORL1, SPRY4, SORCS2, SYN1, GBF1, RESP18, CREG2, FASN, CNTNAP2, RAB6B, CLVS2, GCNT1, NUDC, DNM3, SYNRG, ATP1A3, TMEM130, NAT8F5, TRAPPC9, TENM2, RUVBL1, MTOR, TRP73, CLIP3, ERC1, DNM1	314	1190	19662	1.5786	0.994051	0.172873	18.6396
P35_CB_UP	BIOCARTA	m_mta3Pathway:Downregulated of MTA-3 in ER-negative Breast Tumors	4	1.12676	0.0190631	ALDOA, TUBA4A, TUBA1B, TUBA1C	39	20	1289	6.61026	0.881925	0.881925	19.5731
P35_CB_UP	GOTERM_CC_DIRECT	GO:0005802~trans-Golgi network	8	2.25352	0.0162033	AP2B1, GBF1, SORL1, BSN, CLIP3, CLVS2, SNAP25, GCNT1	314	164	19662	3.05453	0.996	0.178973	19.9297
P35_CB_UP	GOTERM_CC_DIRECT	GO:0043229~intracellular organelle	3	0.84507	0.0175487	RAB3A, SYN1, SNAP25	314	13	19662	14.4503	0.997482	0.186451	21.4067
P35_CB_UP	GOTERM_BP_DIRECT	GO:0031115~negative regulation of microtubule polymerization	3	0.84507	0.0141938	SGK1, STMN1, CLIP3	307	11	18082	16.0634	1	0.488242	21.408
P35_CB_UP	KEGG_PATHWAY	mmu05134:Legionellosis	5	1.40845	0.0197323	HSPA2, EEF1A2, HSPA1A, HSPA1B, HSPA8	141	57	7691	4.78475	0.975447	0.337595	21.8723
P35_CB_UP	GOTERM_CC_DIRECT	GO:0070062~extracellular exosome	57	16.0563	0.0183882	HSP90AB1, ALAD, ALDH1L1, MLPH, TUBB2A, SORL1, HSPH1, HEATR5B, SND1, TUBB5, GNG4, DYNC1H1, TUBA1B, TUBB3, NSF, KLK1B22, PPP2R1A, PTPRF, CRTAC1, ARHGEF18, BASP1, NCAM1, JUP, SERPINA3N, DNPH1, ITGB1BP1, UBC, TUBA4A, RUVBL1, STMN1, EPS8L1, GLG1, ALDOA, RAB3B, ASS1, ARG1, HSPA2, ATIC, FASN, HSPA5, HSPA8, TUBB4A, DNM3, CPNE4, CPNE6, HBA-A1, CDH13, HYOU1, YWHAG, UBA1, OTUB1, FBLN7, GAMT, DNAJB1, DNM1, C…	314	2674	19662	1.33479	0.998114	0.188688	22.3156
P35_CB_UP	GOTERM_BP_DIRECT	GO:0051491~positive regulation of filopodium assembly	4	1.12676	0.0152007	DNM3, TENM2, DPYSL3, BCAS3	307	31	18082	7.59987	1	0.502616	22.7498
P35_CB_UP	GOTERM_CC_DIRECT	GO:0005776~autophagosome	5	1.40845	0.0189584	VPS18, TICAM1, UBQLN2, HAP1, HSPA8	314	64	19662	4.89202	0.99845	0.188355	22.9273
P35_CB_UP	GOTERM_MF_DIRECT	GO:0044212~transcription regulatory region DNA binding	10	2.8169	0.0177777	EGR1, SALL3, FOS, FOSL2, XBP1, RARA, BASP1, TRP73, SMARCA2, ETV5	295	233	17446	2.53815	0.99994	0.284839	22.9902
P35_CB_UP	GOTERM_BP_DIRECT	GO:0009408~response to heat	5	1.40845	0.015735	ALDOA, HSPA2, HSPA1A, HSPA1B, SST	307	57	18082	5.16658	1	0.505448	23.453
P35_CB_UP	GOTERM_BP_DIRECT	GO:0045926~negative regulation of growth	3	0.84507	0.016844	MT2, MT1, IGFBP5	307	12	18082	14.7248	1	0.520408	24.8936
P35_CB_UP	GOTERM_BP_DIRECT	GO:0010038~response to metal ion	3	0.84507	0.016844	ALAD, MT2, MT1	307	12	18082	14.7248	1	0.520408	24.8936
P35_CB_UP	GOTERM_BP_DIRECT	GO:0021953~central nervous system neuron differentiation	3	0.84507	0.016844	BCL11B, NR4A2, LMX1A	307	12	18082	14.7248	1	0.520408	24.8936
P35_CB_UP	GOTERM_MF_DIRECT	GO:0017017~MAP kinase tyrosine/serine/threonine phosphatase activity	3	0.84507	0.01953	DUSP5, DUSP4, DUSP14	295	13	17446	13.6475	0.999977	0.299761	24.967
P35_CB_UP	GOTERM_BP_DIRECT	GO:0006357~regulation of transcription from RNA polymerase II promoter	14	3.94366	0.0181553	TSHZ2, CAMTA2, FOSL2, KLF13, EOMES, FOSB, FOXO3, FOS, ATP2B4, XBP1, ETS2, BCL6, RUVBL1, ETV5	307	397	18082	2.07704	1	0.538251	26.5638
P35_CB_UP	GOTERM_CC_DIRECT	GO:0044297~cell body	6	1.69014	0.0235883	PTK2B, GABRA5, TUBB5, DPYSL3, HSPA1B, NRG1	314	102	19662	3.6834	0.999687	0.222862	27.7317
P35_CB_UP	GOTERM_BP_DIRECT	GO:0045893~positive regulation of transcription, DNA-templated	18	5.07042	0.0191855	EGR1, FOSL2, EOMES, NR4A2, NR4A1, ZBTB16, FOXO3, NPAS4, NR4A3, FOS, ETS2, RARA, TRP73, PHF8, ETV5, SMARCA2, SMARCA4, F2R	307	576	18082	1.84059	1	0.54936	27.8516
P35_CB_UP	GOTERM_MF_DIRECT	GO:0004879~RNA polymerase II transcription factor activity, ligand-activated sequence-specific DNA binding	4	1.12676	0.0224506	NR4A2, NR4A1, RARA, NR4A3	295	36	17446	6.571	0.999995	0.327664	28.1572
P35_CB_UP	GOTERM_MF_DIRECT	GO:0001671~ATPase activator activity	3	0.84507	0.0225346	RAB3A, ATP1B2, DNAJB1	295	14	17446	12.6726	0.999996	0.320261	28.247
P35_CB_UP	GOTERM_BP_DIRECT	GO:0030308~negative regulation of cell growth	7	1.97183	0.019646	CDKN1A, BCL6, HSPA1A, GNG4, SMARCA2, SMARCA4, SLIT3	307	125	18082	3.29835	1	0.549307	28.4203
P35_CB_UP	GOTERM_BP_DIRECT	GO:0051085~chaperone mediated protein folding requiring cofactor	3	0.84507	0.0196866	HSPH1, DNAJB1, HSPA8	307	13	18082	13.5921	1	0.54162	28.4702
P35_CB_UP	GOTERM_MF_DIRECT	GO:0031490~chromatin DNA binding	5	1.40845	0.0239671	XBP1, PER1, BCL6, RARA, FOXO3	295	65	17446	4.54915	0.999998	0.328631	29.7634
P35_CB_UP	GOTERM_BP_DIRECT	GO:0008542~visual learning	5	1.40845	0.0219439	SGK1, MEIS2, PDE1B, ATP1A3, MTOR	307	63	18082	4.67453	1	0.572891	31.1956
P35_CB_UP	GOTERM_BP_DIRECT	GO:0030335~positive regulation of cell migration	9	2.53521	0.0225529	CDH13, IRS2, PTK2B, XBP1, SSH2, TRIM32, HBEGF, HSPA5, F2R	307	203	18082	2.61129	1	0.574786	31.9141
P35_CB_UP	GOTERM_BP_DIRECT	GO:0043200~response to amino acid	4	1.12676	0.0227019	ARG1, ALAD, MTOR, SST	307	36	18082	6.54434	1	0.569223	32.0888
P35_CB_UP	GOTERM_BP_DIRECT	GO:0051895~negative regulation of focal adhesion assembly	3	0.84507	0.0227141	DLC1, ITGB1BP1, BCAS3	307	14	18082	12.6212	1	0.561631	32.1031
P35_CB_UP	GOTERM_CC_DIRECT	GO:0005768~endosome	16	4.50704	0.0284511	RAB3A, VPS18, PTPRF, HPS6, SYT5, CPNE6, NSG2, SORL1, ASTN1, DGKH, L1CAM, RHOV, CLEC16A, CLVS2, SNAP25, RAB11FIP1	314	544	19662	1.8417	0.999942	0.25594	32.4778
P35_CB_UP	GOTERM_MF_DIRECT	GO:0004857~enzyme inhibitor activity	4	1.12676	0.0277011	TXNIP, SCG5, GCHFR, FRY	295	39	17446	6.06554	1	0.36098	33.5767
P35_CB_UP	GOTERM_MF_DIRECT	GO:0005509~calcium ion binding	20	5.6338	0.0278991	SNCB, CRTAC1, SYT5, PCDH20, PCDHGA9, PCDHGB7, PCDHGB6, DLK1, CALB2, PCDHGA2, SLIT3, SLC25A12, CDH13, TENM2, DGKG, VSNL1, FBLN7, DOC2G, NCAN, SPTAN1	295	699	17446	1.6921	1	0.354789	33.7734
P35_CB_UP	GOTERM_BP_DIRECT	GO:0008306~associative learning	4	1.12676	0.0244032	TNR, GABRA5, NRGN, SNAP25	307	37	18082	6.36746	1	0.580339	34.0537
P35_CB_UP	GOTERM_BP_DIRECT	GO:0051897~positive regulation of protein kinase B signaling	6	1.69014	0.0245087	ITGB1BP1, HBEGF, RARA, MTOR, NRG1, IGFBP5	307	97	18082	3.64324	1	0.574424	34.1738
P35_CB_UP	KEGG_PATHWAY	mmu04978:Mineral absorption	4	1.12676	0.0334867	ATP1B2, MT2, ATP1A3, MT1	141	39	7691	5.59447	0.998227	0.469279	34.4156
P35_CB_UP	GOTERM_MF_DIRECT	GO:0008138~protein tyrosine/serine/threonine phosphatase activity	4	1.12676	0.0295838	DUSP5, DUSP4, DUSP14, SSH2	295	40	17446	5.9139	1	0.363723	35.4255
P35_CB_UP	GOTERM_CC_DIRECT	GO:0042734~presynaptic membrane	5	1.40845	0.0317094	GRM2, L1CAM, RIMS1, STX1B, SNAP25	314	75	19662	4.17452	0.999981	0.274094	35.4946
P35_CB_UP	GOTERM_BP_DIRECT	GO:0042220~response to cocaine	4	1.12676	0.0261714	HSP90AB1, NCAM1, PTK2B, MTOR	307	38	18082	6.1999	1	0.591304	36.0392
P35_CB_UP	GOTERM_MF_DIRECT	GO:0004721~phosphoprotein phosphatase activity	7	1.97183	0.0304588	DUSP5, DUSP4, PTPRM, PTPRF, DUSP14, UBASH3B, SSH2	295	139	17446	2.97822	1	0.364356	36.2682
P35_CB_UP	KEGG_PATHWAY	mmu04960:Aldosterone-regulated sodium reabsorption	4	1.12676	0.0357329	SGK1, ATP1B2, ATP1A3, PRKCG	141	40	7691	5.45461	0.99885	0.459505	36.2785
P35_CB_UP	KEGG_PATHWAY	mmu04145:Phagosome	8	2.25352	0.0362511	TUBB2A, TUBB5, TUBA4A, DYNC1H1, TUBA1B, TUBB4A, TUBB3, TUBA1C	141	171	7691	2.55186	0.998959	0.435791	36.7014
P35_CB_UP	GOTERM_CC_DIRECT	GO:0043204~perikaryon	7	1.97183	0.0331237	ASS1, RESP18, KCNB2, CPNE6, MAP1B, ASTN1, HSPA8	314	150	19662	2.92217	0.999989	0.277688	36.7648
P35_CB_UP	GOTERM_MF_DIRECT	GO:0000989~transcription factor activity, transcription factor binding	3	0.84507	0.0325831	NAB2, NAB1, PER1	295	17	17446	10.4363	1	0.376544	38.272
P35_CB_UP	GOTERM_CC_DIRECT	GO:0030673~axolemma	3	0.84507	0.036142	ROBO1, CNTNAP2, NRG1	314	19	19662	9.88703	0.999996	0.292216	39.3983
P35_CB_UP	GOTERM_BP_DIRECT	GO:0021680~cerebellar Purkinje cell layer development	3	0.84507	0.0292965	SEZ6L2, SEZ6L, HSPA5	307	16	18082	11.0436	1	0.626024	39.4115
P35_CB_UP	GOTERM_BP_DIRECT	GO:0021794~thalamus development	3	0.84507	0.0292965	NCAM1, CNTNAP2, OGDH	307	16	18082	11.0436	1	0.626024	39.4115
P35_CB_UP	GOTERM_BP_DIRECT	GO:0001706~endoderm formation	3	0.84507	0.0292965	DUSP5, DUSP4, EOMES	307	16	18082	11.0436	1	0.626024	39.4115
P35_CB_UP	GOTERM_BP_DIRECT	GO:0010976~positive regulation of neuron projection development	7	1.97183	0.0300909	PTK2B, ENC1, TENM3, DPYSL3, MTOR, HSPA5, HAP1	307	138	18082	2.98763	1	0.628871	40.2416
P35_CB_UP	GOTERM_BP_DIRECT	GO:0007420~brain development	9	2.53521	0.0311126	IRS2, BAG3, GABRA5, EOMES, STMN1, MTOR, LMX1A, NRG1, PHF8	307	216	18082	2.45413	1	0.634341	41.2936
P35_CB_UP	GOTERM_MF_DIRECT	GO:0051087~chaperone binding	5	1.40845	0.0378251	SDF2L1, BAG3, ATP1A3, DNAJB1, OGDH	295	75	17446	3.9426	1	0.414841	42.9682
P35_CB_UP	GOTERM_BP_DIRECT	GO:0035887~aortic smooth muscle cell differentiation	2	0.56338	0.0335603	SMARCA2, SMARCA4	307	2	18082	58.899	1	0.655771	43.7434
P35_CB_UP	GOTERM_BP_DIRECT	GO:0061162~establishment of monopolar cell polarity	2	0.56338	0.0335603	GBF1, MAP1B	307	2	18082	58.899	1	0.655771	43.7434
P35_CB_UP	GOTERM_BP_DIRECT	GO:0010565~regulation of cellular ketone metabolic process	2	0.56338	0.0335603	PDK2, PDK4	307	2	18082	58.899	1	0.655771	43.7434
P35_CB_UP	GOTERM_BP_DIRECT	GO:0007162~negative regulation of cell adhesion	4	1.12676	0.0339113	CDH13, RND1, TNR, NAT8F5	307	42	18082	5.60943	1	0.652919	44.0867
P35_CB_UP	GOTERM_BP_DIRECT	GO:0006914~autophagy	7	1.97183	0.0339178	CLEC16A, VPS18, XBP1, ATG101, UBQLN2, MTOR, HAP1	307	142	18082	2.90347	1	0.64637	44.0931
P35_CB_UP	GOTERM_CC_DIRECT	GO:0015629~actin cytoskeleton	8	2.25352	0.0423469	ALDOA, CORO2B, JUP, MAD1L1, TRIOBP, MLPH, RARA, SNAP25	314	201	19662	2.49225	1	0.326505	44.4963
P35_CB_UP	GOTERM_CC_DIRECT	GO:1903561~extracellular vesicle	4	1.12676	0.0430134	RAB3A, TUBB2A, ATP1A3, SPTAN1	314	49	19662	5.11166	1	0.323664	45.0196
P35_CB_UP	GOTERM_BP_DIRECT	GO:0030890~positive regulation of B cell proliferation	4	1.12676	0.0360117	CDKN1A, IRS2, TICAM1, BCL6	307	43	18082	5.47898	1	0.662262	46.1003
P35_CB_UP	BIOCARTA	m_dreamPathway:Repression of Pain Sensation by the Transcriptional Regulator DREAM	3	0.84507	0.0538047	FOS, PRKAR1B, POLR2A	39	13	1289	7.62722	0.997843	0.953555	46.5224
P35_CB_UP	GOTERM_BP_DIRECT	GO:0007626~locomotory behavior	6	1.69014	0.0365808	PDE1B, ASTN1, LMX1A, NRG1, SNAP25, ETV5	307	108	18082	3.27217	1	0.661742	46.634
P35_CB_UP	GOTERM_CC_DIRECT	GO:0016607~nuclear speck	8	2.25352	0.0462252	ZCCHC12, ZMIZ1, PRPF8, FTO, GATAD2B, HSPA1A, ZBTB16, BASP1	314	205	19662	2.44362	1	0.336465	47.4777
P35_CB_UP	GOTERM_BP_DIRECT	GO:0010468~regulation of gene expression	11	3.09859	0.0377484	TSHZ2, BCL11B, NR4A2, EOMES, DNMT1, DLK1, TRP73, LMX1A, STX1B, TOB2, UNCX	307	308	18082	2.10354	1	0.667211	47.7134
P35_CB_UP	GOTERM_BP_DIRECT	GO:0016311~dephosphorylation	6	1.69014	0.0378306	DUSP5, DUSP4, PTPRM, PTPRF, DUSP14, SSH2	307	109	18082	3.24215	1	0.661866	47.7887
P35_CB_UP	GOTERM_MF_DIRECT	GO:0019905~syntaxin binding	5	1.40845	0.0461632	VPS18, SYT5, DOC2G, NSF, SPTAN1	295	80	17446	3.69619	1	0.472923	49.7579
P35_CB_UP	GOTERM_BP_DIRECT	GO:0006836~neurotransmitter transport	4	1.12676	0.0404083	SLC6A5, RIMS1, SV2C, STX1B	307	45	18082	5.23547	1	0.680414	50.0965
P35_CB_UP	GOTERM_CC_DIRECT	GO:0005654~nucleoplasm	41	11.5493	0.0518301	FOSL2, NDN, SNCB, HCFC1, FOXO3, POLR2A, FOS, HSPH1, HEXIM2, HSPA2, PTK2B, TNR, TRIM45, GATAD2B, PER1, RARA, BRD4, ETV5, EGR1, DHX8, PDK2, SGK1, ENC1, NR4A2, IRF2BP1, MCM3, CHAMP1, CDKL5, DUSP4, CDKN1A, BCORL1, ETS2, ZMIZ1, POLD2, NELFA, UBC, DNMT1, RUVBL1, TRP73, RBM14, SMARCA2	314	1935	19662	1.32679	1	0.362195	51.5251
P35_CB_UP	GOTERM_MF_DIRECT	GO:0016791~phosphatase activity	6	1.69014	0.0494975	DUSP5, DUSP4, PTPRM, PTPRF, DUSP14, SSH2	295	118	17446	3.00707	1	0.488845	52.256
P35_CB_UP	GOTERM_MF_DIRECT	GO:0043423~3-phosphoinositide-dependent protein kinase binding	2	0.56338	0.0497116	SGK1, PTK2B	295	3	17446	39.426	1	0.48212	52.4124
P35_CB_UP	GOTERM_BP_DIRECT	GO:0009749~response to glucose	5	1.40845	0.0432791	EGR1, TXNIP, IRS2, PTK2B, NR0B2	307	78	18082	3.77558	1	0.699964	52.5535
P35_CB_UP	GOTERM_BP_DIRECT	GO:0006883~cellular sodium ion homeostasis	3	0.84507	0.0443847	SGK1, ATP1B2, ATP1A3	307	20	18082	8.83485	1	0.7035	53.4691
P35_CB_UP	GOTERM_BP_DIRECT	GO:0009116~nucleoside metabolic process	3	0.84507	0.0443847	UMPS, DNPH1, ATIC	307	20	18082	8.83485	1	0.7035	53.4691
P35_CB_UP	GOTERM_BP_DIRECT	GO:0045444~fat cell differentiation	5	1.40845	0.0450045	TRIM32, NR4A2, NR4A1, NR4A3, CLIP3	307	79	18082	3.72779	1	0.702938	53.975
P35_CB_UP	GOTERM_MF_DIRECT	GO:0050998~nitric-oxide synthase binding	3	0.84507	0.0523935	DNM3, ATP2B4, DNM1	295	22	17446	8.06441	1	0.492537	54.3313
P35_CB_UP	GOTERM_MF_DIRECT	GO:0044325~ion channel binding	6	1.69014	0.0525072	HSP90AB1, PACS1, KCNB2, RIMS1, SNAP25, HAP1	295	120	17446	2.95695	1	0.485414	54.4111
P35_CB_UP	KEGG_PATHWAY	mmu04612:Antigen processing and presentation	5	1.40845	0.0619878	HSP90AB1, HSPA2, HSPA1A, HSPA1B, HSPA8	141	82	7691	3.32598	0.999993	0.599717	54.7306
P35_CB_UP	GOTERM_MF_DIRECT	GO:0016887~ATPase activity	8	2.25352	0.0534917	HSPA1A, RUVBL1, HSPA5, DYNC1H1, SMARCA2, NSF, HSPA8, SMARCA4	295	200	17446	2.36556	1	0.484258	55.0961
P35_CB_UP	GOTERM_BP_DIRECT	GO:0048661~positive regulation of smooth muscle cell proliferation	5	1.40845	0.0467679	EGR1, CDH13, HBEGF, NR4A3, MTOR	307	80	18082	3.68119	1	0.711514	55.3863
P35_CB_UP	GOTERM_BP_DIRECT	GO:0051412~response to corticosterone	3	0.84507	0.0485208	FOS, CDKN1A, FOSB	307	21	18082	8.41415	1	0.719539	56.7489
P35_CB_UP	GOTERM_BP_DIRECT	GO:0007565~female pregnancy	5	1.40845	0.0485692	FOS, UMPS, RARA, FOSB, IGFBP5	307	81	18082	3.63574	1	0.714532	56.786
P35_CB_UP	GOTERM_BP_DIRECT	GO:0071386~cellular response to corticosterone stimulus	2	0.56338	0.0499171	FOXO3, NPAS4	307	3	18082	39.266	1	0.71927	57.8061
P35_CB_UP	GOTERM_BP_DIRECT	GO:0061669~spontaneous neurotransmitter secretion	2	0.56338	0.0499171	RIMS1, STX1B	307	3	18082	39.266	1	0.71927	57.8061
P35_CB_UP	GOTERM_BP_DIRECT	GO:0043624~cellular protein complex disassembly	2	0.56338	0.0499171	NRG1, HSPA8	307	3	18082	39.266	1	0.71927	57.8061
P35_CB_UP	GOTERM_MF_DIRECT	GO:0003677~DNA binding	41	11.5493	0.0584199	CAMTA2, TSHZ2, FOSL2, NDN, PRR12, SSH2, FOXO3, ZBTB16, POLR2A, FOS, PEG10, MEIS2, XBP1, BCL6, RARA, BRD4, TLX3, NFIL3, KDM5B, ETV5, NAT14, EGR1, ESRRB, KLF13, EGR4, NR4A2, EOMES, NR4A1, NR0B2, NR4A3, LMX1A, FOSB, NPAS4, MCM3, SALL3, ETS2, POLD2, DNMT1, TRP73, SMARCA2, UNCX	295	1847	17446	1.31278	1	0.507994	58.3834
P35_CB_UP	GOTERM_BP_DIRECT	GO:0031668~cellular response to extracellular stimulus	3	0.84507	0.0527906	FOS, CDKN1A, NR4A2	307	22	18082	8.03168	1	0.734465	59.9058
P35_CB_UP	GOTERM_BP_DIRECT	GO:0035924~cellular response to vascular endothelial growth factor stimulus	3	0.84507	0.0527906	XBP1, ITGB1BP1, NR4A1	307	22	18082	8.03168	1	0.734465	59.9058
P35_CB_UP	KEGG_PATHWAY	mmu04911:Insulin secretion	5	1.40845	0.0712771	RAB3A, ATP1B2, ATP1A3, PRKCG, SNAP25	141	86	7691	3.17128	0.999999	0.625592	59.9804
P35_CB_UP	GOTERM_MF_DIRECT	GO:0003779~actin binding	11	3.09859	0.0611433	CORO2B, TRIOBP, YWHAG, VPS18, MLPH, SSH2, ENC1, MAP1B, TNNI3, EPS8L1, SPTAN1	295	338	17446	1.92464	1	0.516922	60.1025
P35_CB_UP	GOTERM_MF_DIRECT	GO:0051117~ATPase binding	5	1.40845	0.0614568	RAB3A, ATP1B2, SDF2L1, DNAJB1, RUVBL1	295	88	17446	3.36017	1	0.51139	60.2961
P35_CB_UP	KEGG_PATHWAY	mmu04727:GABAergic synapse	5	1.40845	0.0737051	GABRA5, PRKCG, GNG4, HAP1, NSF	141	87	7691	3.13483	0.999999	0.613018	61.2571
P35_CB_UP	KEGG_PATHWAY	mmu04012:ErbB signaling pathway	5	1.40845	0.0737051	CDKN1A, HBEGF, PRKCG, MTOR, NRG1	141	87	7691	3.13483	0.999999	0.613018	61.2571
P35_CB_UP	GOTERM_BP_DIRECT	GO:0007611~learning or memory	4	1.12676	0.0551293	EGR1, NCAM1, PRKAR1B, PRKCG	307	51	18082	4.61953	1	0.745038	61.5417
P35_CB_UP	GOTERM_MF_DIRECT	GO:0004740~pyruvate dehydrogenase (acetyl-transferring) kinase activity	2	0.56338	0.0657286	PDK2, PDK4	295	4	17446	29.5695	1	0.528593	62.8482
P35_CB_UP	GOTERM_MF_DIRECT	GO:0005001~transmembrane receptor protein tyrosine phosphatase activity	2	0.56338	0.0657286	PTPRM, PTPRF	295	4	17446	29.5695	1	0.528593	62.8482
P35_CB_UP	GOTERM_CC_DIRECT	GO:0030672~synaptic vesicle membrane	4	1.12676	0.0732853	SYN1, SYT5, SYN2, SV2C	314	61	19662	4.10609	1	0.466043	64.4963
P35_CB_UP	KEGG_PATHWAY	mmu05221:Acute myeloid leukemia	4	1.12676	0.0815171	JUP, RARA, ZBTB16, MTOR	141	56	7691	3.89615	1	0.627864	65.115
P35_CB_UP	GOTERM_MF_DIRECT	GO:0017022~myosin binding	3	0.84507	0.070574	MLPH, TRIM32, SNAP25	295	26	17446	6.82373	1	0.547677	65.5578
P35_CB_UP	GOTERM_MF_DIRECT	GO:0017137~Rab GTPase binding	6	1.69014	0.0709268	HPS6, MLPH, ERC1, RIMS1, RAB11FIP1, NSF	295	131	17446	2.70866	1	0.542436	65.7477
P35_CB_UP	GOTERM_BP_DIRECT	GO:0050850~positive regulation of calcium-mediated signaling	3	0.84507	0.0617087	NCAM1, CDH13, L1CAM	307	24	18082	7.36238	1	0.779845	65.8138
P35_CB_UP	GOTERM_BP_DIRECT	GO:0032781~positive regulation of ATPase activity	3	0.84507	0.0617087	HSPA2, ATP1B2, DNAJB1	307	24	18082	7.36238	1	0.779845	65.8138
P35_CB_UP	GOTERM_BP_DIRECT	GO:0030512~negative regulation of transforming growth factor beta receptor signaling pathway	4	1.12676	0.0633202	GLG1, PEG10, SKOR2, HSPA5	307	54	18082	4.36289	1	0.784044	66.7899
P35_CB_UP	KEGG_PATHWAY	mmu04360:Axon guidance	6	1.69014	0.0859422	EPHB6, RND1, ROBO1, DPYSL5, L1CAM, SLIT3	141	129	7691	2.53703	1	0.625884	67.1404
P35_CB_UP	GOTERM_BP_DIRECT	GO:0007417~central nervous system development	5	1.40845	0.0643354	NDN, ZBTB16, LMX1A, TLX3, NCAN	307	89	18082	3.30893	1	0.78492	67.3913
P35_CB_UP	GOTERM_BP_DIRECT	GO:0006813~potassium ion transport	6	1.69014	0.0648046	ATP1B2, KCNB2, KCNA4, ATP1A3, KCNH3, NSF	307	127	18082	2.78263	1	0.782903	67.6657
P35_CB_UP	GOTERM_BP_DIRECT	GO:0048133~male germ-line stem cell asymmetric division	2	0.56338	0.065998	ZBTB16, ETV5	307	4	18082	29.4495	1	0.78471	68.354
P35_CB_UP	GOTERM_BP_DIRECT	GO:0010510~regulation of acetyl-CoA biosynthetic process from pyruvate	2	0.56338	0.065998	PDK2, PDK4	307	4	18082	29.4495	1	0.78471	68.354
P35_CB_UP	GOTERM_BP_DIRECT	GO:0045682~regulation of epidermis development	2	0.56338	0.065998	NAB2, NAB1	307	4	18082	29.4495	1	0.78471	68.354
P35_CB_UP	GOTERM_BP_DIRECT	GO:0010273~detoxification of copper ion	2	0.56338	0.065998	MT2, MT1	307	4	18082	29.4495	1	0.78471	68.354
P35_CB_UP	GOTERM_BP_DIRECT	GO:0032095~regulation of response to food	2	0.56338	0.065998	PRKCG, MTOR	307	4	18082	29.4495	1	0.78471	68.354
P35_CB_UP	GOTERM_BP_DIRECT	GO:0006468~protein phosphorylation	16	4.50704	0.0660133	PDK2, SGK1, PDK4, HK1, PRKCG, CDKL5, TRIB1, CAMKV, EPHB6, PTK2B, PRKAR1B, RARA, DYRK3, MTOR, BRD4, SIK3	307	576	18082	1.63608	1	0.780395	68.3628
P35_CB_UP	GOTERM_BP_DIRECT	GO:0035914~skeletal muscle cell differentiation	4	1.12676	0.0661687	EGR1, FOS, EOMES, NR4A1	307	55	18082	4.28357	1	0.776844	68.4514
P35_CB_UP	GOTERM_BP_DIRECT	GO:0030307~positive regulation of cell growth	5	1.40845	0.0664736	SGK1, DNPH1, PTK2B, TRIM32, HBEGF	307	90	18082	3.27217	1	0.774112	68.6245
P35_CB_UP	GOTERM_BP_DIRECT	GO:0006457~protein folding	6	1.69014	0.0665529	HSP90AB1, TUBB5, DNAJB1, TUBA1B, HSPA8, NUDC	307	128	18082	2.76089	1	0.770236	68.6694
P35_CB_UP	GOTERM_BP_DIRECT	GO:0045892~negative regulation of transcription, DNA-templated	16	4.50704	0.0677181	ZBTB16, NR0B2, BASP1, DUSP5, HEXIM2, NAB2, NAB1, PER1, DNMT1, RARA, BCL6, NRG1, KDM5B, SMARCA2, HSPA8, SMARCA4	307	579	18082	1.62761	1	0.772056	69.3219
P35_CB_UP	GOTERM_CC_DIRECT	GO:0005788~endoplasmic reticulum lumen	5	1.40845	0.0845759	HYOU1, GBF1, SDF2L1, P4HA3, HSPA5	314	104	19662	3.01047	1	0.508921	69.9503
P35_CB_UP	GOTERM_BP_DIRECT	GO:0031100~organ regeneration	4	1.12676	0.0690751	CDKN1A, ATIC, NR4A3, NR0B2	307	56	18082	4.20707	1	0.774794	70.0658
P35_CB_UP	GOTERM_MF_DIRECT	GO:0055131~C3HC4-type RING finger domain binding	2	0.56338	0.0814766	HSPA1A, HSPA8	295	5	17446	23.6556	1	0.58763	70.996
P35_CB_UP	GOTERM_BP_DIRECT	GO:0043278~response to morphine	3	0.84507	0.0710955	PRKCG, FOSB, MTOR	307	26	18082	6.79604	1	0.780688	71.142
P35_CB_UP	GOTERM_MF_DIRECT	GO:0045296~cadherin binding	3	0.84507	0.085346	JUP, CDH13, PTPRM	295	29	17446	6.11783	1	0.598398	72.7255
P35_CB_UP	GOTERM_BP_DIRECT	GO:0042593~glucose homeostasis	6	1.69014	0.0756854	PDK2, XBP1, PDK4, FOXO3, VGF, IGFBP5	307	133	18082	2.6571	1	0.798034	73.453
P35_CB_UP	GOTERM_BP_DIRECT	GO:0048821~erythrocyte development	3	0.84507	0.0759517	HBA-A1, HBB-B1, BCL6	307	27	18082	6.54434	1	0.795339	73.5816
P35_CB_UP	GOTERM_CC_DIRECT	GO:0016020~membrane	124	34.9296	0.0939101	GPRIN1, DLC1, RAB9B, SYT5, ATP1B2, NSG2, L1CAM, RANGAP1, FOXO3, DLK1, UBQLN2, SEZ6L2, ATP2B4, DIRAS2, GBF1, ROBO1, SND1, GNG4, ISLR2, PTPRM, PTPRF, BASP1, TMEM130, JUP, NCAM1, MAGEE1, RND1, RASGRF2, REM2, VSNL1, DOC2G, STMN1, CLIP3, FAM163B, ERC1, SMARCA4, ALDOA, GLG1, PCDH20, KCNA4, ASTN1, RIMS1, SORCS2, CAMKV, CORO2B, EPHB6, GCNT1, NAT14, DCAKD, KCNB2, CPNE6, GABRA5, SLC25A12, HYOU1, PRKAR1B, F…	314	6998	19662	1.10955	1	0.539376	73.8616
P35_CB_UP	GOTERM_MF_DIRECT	GO:0044822~poly(A) RNA binding	26	7.32394	0.0887672	HSP90AB1, ALDOA, ASS1, PCDH20, PCDHGA9, TCOF1, RIMS1, POLR2A, PEG10, MRPL14, DUSP14, PRPF8, SND1, FASN, UBAP2L, LSM2, DYNC1H1, HSPA8, DHX8, YWHAG, UBFD1, UBA1, UBC, POP1, RBM14, DNM1	295	1113	17446	1.3815	1	0.606633	74.1741
P35_CB_UP	GOTERM_CC_DIRECT	GO:0008180~COP9 signalosome	3	0.84507	0.0966521	HSP90AB1, BASP1, HSPA5	314	33	19662	5.69253	1	0.541978	74.9175
P35_CB_UP	GOTERM_BP_DIRECT	GO:0007205~protein kinase C-activating G-protein coupled receptor signaling pathway	3	0.84507	0.0809097	DGKG, DGKH, F2R	307	28	18082	6.31061	1	0.812601	75.8713
P35_CB_UP	GOTERM_BP_DIRECT	GO:2000463~positive regulation of excitatory postsynaptic potential	3	0.84507	0.0809097	PTK2B, RIMS1, STX1B	307	28	18082	6.31061	1	0.812601	75.8713
P35_CB_UP	GOTERM_BP_DIRECT	GO:0045638~negative regulation of myeloid cell differentiation	3	0.84507	0.0809097	MEIS2, PTK2B, ZBTB16	307	28	18082	6.31061	1	0.812601	75.8713
P35_CB_UP	GOTERM_BP_DIRECT	GO:0070100~negative regulation of chemokine-mediated signaling pathway	2	0.56338	0.0818075	ROBO1, SLIT3	307	5	18082	23.5596	1	0.812545	76.2655
P35_CB_UP	GOTERM_BP_DIRECT	GO:0097167~circadian regulation of translation	2	0.56338	0.0818075	PER1, RBM14	307	5	18082	23.5596	1	0.812545	76.2655
P35_CB_UP	GOTERM_BP_DIRECT	GO:0090335~regulation of brown fat cell differentiation	2	0.56338	0.0818075	FTO, MTOR	307	5	18082	23.5596	1	0.812545	76.2655
P35_CB_UP	GOTERM_BP_DIRECT	GO:0010424~DNA methylation on cytosine within a CG sequence	2	0.56338	0.0818075	DNMT1, SMARCA4	307	5	18082	23.5596	1	0.812545	76.2655
P35_CB_UP	GOTERM_BP_DIRECT	GO:0021891~olfactory bulb interneuron development	2	0.56338	0.0818075	SALL3, ROBO1	307	5	18082	23.5596	1	0.812545	76.2655
P35_CB_UP	GOTERM_BP_DIRECT	GO:0003374~dynamin polymerization involved in mitochondrial fission	2	0.56338	0.0818075	DNM3, DNM1	307	5	18082	23.5596	1	0.812545	76.2655
P35_CB_UP	GOTERM_BP_DIRECT	GO:0031670~cellular response to nutrient	2	0.56338	0.0818075	PDK2, XBP1	307	5	18082	23.5596	1	0.812545	76.2655
P35_CB_UP	GOTERM_MF_DIRECT	GO:0030275~LRR domain binding	2	0.56338	0.09696	NCAM1, ROBO1	295	6	17446	19.713	1	0.633973	77.3571
P35_CB_UP	GOTERM_BP_DIRECT	GO:0042147~retrograde transport, endosome to Golgi	4	1.12676	0.0844444	RAB9B, GBF1, RAB6B, ERC1	307	61	18082	3.86223	1	0.819267	77.3883
P35_CB_UP	GOTERM_MF_DIRECT	GO:0008270~zinc ion binding	25	7.04225	0.0975583	ALAD, USP27X, PEG10, RNF219, TRIM45, MT2, MT1, GATAD2B, RARA, KDM5B, LONRF2, ZCCHC12, EGR1, ESRRB, NR4A2, NR4A1, PRKCG, NR4A3, LMX1A, RNF43, VAT1L, ZMIZ1, TRIM32, DNMT1, PHF8	295	1075	17446	1.37533	1	0.629728	77.5746
P35_CB_UP	GOTERM_BP_DIRECT	GO:0046686~response to cadmium ion	3	0.84507	0.0859648	ARG1, ALAD, MT1	307	29	18082	6.093	1	0.821498	78.0128
P35_CB_UP	GOTERM_BP_DIRECT	GO:0009612~response to mechanical stimulus	4	1.12676	0.0909663	TXNIP, MEIS2, PTK2B, FOSB	307	63	18082	3.73962	1	0.835986	79.9546
P35_CB_UP	GOTERM_BP_DIRECT	GO:0034599~cellular response to oxidative stress	4	1.12676	0.0909663	XBP1, NR4A2, FOXO3, ETV5	307	63	18082	3.73962	1	0.835986	79.9546
P35_CB_UP	GOTERM_BP_DIRECT	GO:0032570~response to progesterone	3	0.84507	0.0911122	TXNIP, FOS, FOSB	307	30	18082	5.8899	1	0.833161	80.0088
P35_CB_UP	GOTERM_BP_DIRECT	GO:0051602~response to electrical stimulus	3	0.84507	0.0911122	RAB3A, XBP1, EEF1A2	307	30	18082	5.8899	1	0.833161	80.0088
P35_CB_UP	GOTERM_BP_DIRECT	GO:0001958~endochondral ossification	3	0.84507	0.0911122	NAB2, NAB1, SIK3	307	30	18082	5.8899	1	0.833161	80.0088
P35_CB_UP	GOTERM_BP_DIRECT	GO:0050775~positive regulation of dendrite morphogenesis	3	0.84507	0.0911122	SGK1, PTPRF, CDKL5	307	30	18082	5.8899	1	0.833161	80.0088
P35_CB_UP	GOTERM_BP_DIRECT	GO:0010975~regulation of neuron projection development	3	0.84507	0.0911122	PTPRF, DPYSL3, SNAP25	307	30	18082	5.8899	1	0.833161	80.0088
P35_CB_UP	GOTERM_BP_DIRECT	GO:0044344~cellular response to fibroblast growth factor stimulus	3	0.84507	0.0911122	ITGB1BP1, NR4A1, KDM5B	307	30	18082	5.8899	1	0.833161	80.0088
P35_CB_UP	GOTERM_BP_DIRECT	GO:0030036~actin cytoskeleton organization	6	1.69014	0.0937375	CORO2B, DLC1, ARHGEF18, SSH2, BCL6, ARHGAP26	307	142	18082	2.48869	1	0.838729	80.9599
P35_CB_UP	GOTERM_BP_DIRECT	GO:0045664~regulation of neuron differentiation	3	0.84507	0.0963475	YWHAG, BCL11B, EOMES	307	31	18082	5.69991	1	0.843973	81.8631
P35_CB_UP	GOTERM_BP_DIRECT	GO:0090036~regulation of protein kinase C signaling	2	0.56338	0.0973503	SEZ6L2, SEZ6L	307	6	18082	19.633	1	0.843998	82.1993
P35_CB_UP	GOTERM_BP_DIRECT	GO:0006207~'de novo' pyrimidine nucleobase biosynthetic process	2	0.56338	0.0973503	UMPS, MTOR	307	6	18082	19.633	1	0.843998	82.1993
P35_CB_UP	GOTERM_BP_DIRECT	GO:0071499~cellular response to laminar fluid shear stress	2	0.56338	0.0973503	ASS1, XBP1	307	6	18082	19.633	1	0.843998	82.1993
P35_CB_UP	GOTERM_BP_DIRECT	GO:0045666~positive regulation of neuron differentiation	5	1.40845	0.0975105	TRIM32, MAP1B, BCL6, RARA, ETV5	307	103	18082	2.85918	1	0.84139	82.2525
P35_HC_DN	GOTERM_CC_DIRECT	GO:0014069~postsynaptic density	8	12.1212	6.3712e-06	MIB1, IL1R1, GRIN2B, ERBB4, BMPR2, GRIN2A, CACNG5, GRM1	59	239	19662	11.155	0.000713322	0.000713322	0.00722202
P35_HC_DN	GOTERM_CC_DIRECT	GO:0045202~synapse	9	13.6364	0.000111128	SHISA6, SLC17A6, GRIN2B, MYO7A, GRIN2A, CACNG5, DOC2B, SV2C, FRRS1L	59	505	19662	5.93918	0.0123699	0.0062042	0.1259
P35_HC_DN	GOTERM_CC_DIRECT	GO:0016020~membrane	35	53.0303	0.000286748	IL1R1, MEGF9, ADCY1, ERBB4, BMPR2, PLVAP, CNTNAP5C, FRRS1L, SHISA6, PCDHGB1, CD47, MRS2, GRIN2B, VPS13C, ANO3, SV2C, STUM, UST, CBL, PTPN4, GRIN2A, CACNG5, COL25A1, RGS16, GRM1, PRKCD, CACNA2D2, ELFN1, HBA-A2, MIB1, SLC17A6, KCNJ6, EPHA6, DSP, DOC2B	59	6998	19662	1.66675	0.03161	0.0106497	0.32457
P35_HC_DN	KEGG_PATHWAY	mmu04724:Glutamatergic synapse	5	7.57576	0.000962899	ADCY1, SLC17A6, GRIN2B, GRIN2A, GRM1	31	115	7691	10.7868	0.0909662	0.0909662	1.06157
P35_HC_DN	KEGG_PATHWAY	mmu04720:Long-term potentiation	4	6.06061	0.00207679	ADCY1, GRIN2B, GRIN2A, GRM1	31	66	7691	15.0362	0.186017	0.0977898	2.27681
P35_HC_DN	GOTERM_MF_DIRECT	GO:0005262~calcium channel activity	4	6.06061	0.00239282	GRIN2B, GRIN2A, CACNG5, CACNA2D2	55	86	17446	14.7535	0.354939	0.354939	2.91568
P35_HC_DN	GOTERM_CC_DIRECT	GO:0030054~cell junction	8	12.1212	0.00501679	SLC17A6, GRIN2B, GRIN2A, CACNG5, DSP, AMOTL1, SV2C, FRRS1L	59	718	19662	3.71314	0.43067	0.131358	5.54177
P35_HC_DN	GOTERM_BP_DIRECT	GO:0045471~response to ethanol	4	6.06061	0.00463302	GRIN2B, CBL, GRIN2A, LCT	53	117	18082	11.6639	0.88189	0.88189	6.39516
P35_HC_DN	GOTERM_CC_DIRECT	GO:0008021~synaptic vesicle	4	6.06061	0.00613378	SLC17A6, GRIN2B, GRIN2A, SV2C	59	126	19662	10.5795	0.497972	0.128744	6.73687
P35_HC_DN	KEGG_PATHWAY	mmu04915:Estrogen signaling pathway	4	6.06061	0.00634742	ADCY1, KCNJ6, GRM1, PRKCD	31	98	7691	10.1264	0.46762	0.189523	6.81123
P35_HC_DN	KEGG_PATHWAY	mmu04713:Circadian entrainment	4	6.06061	0.00634742	ADCY1, KCNJ6, GRIN2B, GRIN2A	31	98	7691	10.1264	0.46762	0.189523	6.81123
P35_HC_DN	KEGG_PATHWAY	mmu04723:Retrograde endocannabinoid signaling	4	6.06061	0.00728458	ADCY1, SLC17A6, KCNJ6, GRM1	31	103	7691	9.63483	0.5151	0.165526	7.7803
P35_HC_DN	GOTERM_BP_DIRECT	GO:0048511~rhythmic process	4	6.06061	0.005947	ADCY1, GRIN2B, GRIN2A, PROX1	53	128	18082	10.6616	0.935674	0.746374	8.13844
P35_HC_DN	GOTERM_BP_DIRECT	GO:0006811~ion transport	7	10.6061	0.00638523	MRS2, SLC17A6, KCNJ6, GRIN2B, GRIN2A, CACNG5, CACNA2D2	53	584	18082	4.08936	0.947483	0.625516	8.71309
P35_HC_UP	GOTERM_MF_DIRECT	GO:0001077~transcriptional activator activity, RNA polymerase II core promoter proximal region sequence-specific binding	11	13.253	6.56844e-08	EGR1, MEF2C, FOS, SATB2, EGR2, NDN, OTX2, NR4A1, FOSB, NPAS4, JUNB	67	270	17446	10.6084	1.44505e-05	1.44505e-05	8.36122e-05
P35_HC_UP	GOTERM_BP_DIRECT	GO:0035914~skeletal muscle cell differentiation	6	7.22892	2.09518e-06	EGR1, MEF2C, FOS, EGR2, BTG2, NR4A1	70	55	18082	28.1797	0.00152832	0.00152832	0.00317737
P35_HC_UP	GOTERM_CC_DIRECT	GO:0005576~extracellular region	19	22.8916	3.65352e-05	WFIKKN2, KL, ENPP2, PAMR1, 1500015O10RIK, COL5A1, CBLN3, TTR, EPHB6, VEGFD, ACE, CBLN1, F5, FOLR1, SOSTDC1, COL6A1, SEMA3A, COL8A1, COL11A1	72	1753	19662	2.95983	0.00455657	0.00455657	0.0422416
P35_HC_UP	GOTERM_MF_DIRECT	GO:0000978~RNA polymerase II core promoter proximal region sequence-specific DNA binding	9	10.8434	6.03508e-05	MEF2C, FOS, SATB2, EGR2, NDN, OTX2, FOSB, NPAS4, JUNB	67	359	17446	6.52783	0.0131898	0.0066168	0.0767957
P35_HC_UP	GOTERM_CC_DIRECT	GO:0030054~cell junction	11	13.253	0.000244329	CBLN3, CPLX3, STX1A, ARC, CBLN1, CHRM4, GABRA6, FAT2, CLDN1, CLDN2, TRPV4	72	718	19662	4.18373	0.0300831	0.0151564	0.282181
P35_HC_UP	KEGG_PATHWAY	mmu05031:Amphetamine addiction	5	6.0241	0.000344006	FOS, STX1A, ARC, PPP1R1B, FOSB	40	67	7691	14.3489	0.02581	0.02581	0.361405
P35_HC_UP	GOTERM_BP_DIRECT	GO:0071310~cellular response to organic substance	4	4.81928	0.000267295	EGR1, SATB2, EGR2, NR4A1	70	33	18082	31.3108	0.17729	0.0929664	0.404595
P35_HC_UP	GOTERM_BP_DIRECT	GO:0032870~cellular response to hormone stimulus	4	4.81928	0.000764627	FOS, DUSP1, FOSB, JUNB	70	47	18082	21.9842	0.427871	0.169835	1.15332
P35_HC_UP	GOTERM_BP_DIRECT	GO:0051591~response to cAMP	4	4.81928	0.000971372	FOS, DUSP1, FOSB, JUNB	70	51	18082	20.2599	0.508083	0.162523	1.46302
P35_HC_UP	GOTERM_MF_DIRECT	GO:0005515~protein binding	28	33.7349	0.00119974	MEF2C, COBL, WFIKKN2, NDN, TTR, ACE, SOSTDC1, KCNE2, TRPV4, PLXND1, NGEF, STX1A, SATB2, EGR2, CCKBR, KL, OTX2, NR4A1, JUNB, COL5A1, CBLN3, CBLN1, VEGFD, BTG2, CLDN1, CAR8, CLDN2, STMN1	67	4092	17446	1.78174	0.232105	0.0842702	1.5165
P35_HC_UP	GOTERM_BP_DIRECT	GO:0071277~cellular response to calcium ion	4	4.81928	0.00108676	MEF2C, FOS, FOSB, JUNB	70	53	18082	19.4954	0.547861	0.146793	1.63548
P35_HC_UP	GOTERM_CC_DIRECT	GO:0005887~integral component of plasma membrane	12	14.4578	0.00224017	EPHB6, CHRM4, KL, ENPP2, GABRA6, CLDN1, TRPV4, AQP1, PLXND1, STEAP1, SLC4A5, KCNJ13	72	1126	19662	2.9103	0.24447	0.089212	2.56012
P35_HC_UP	GOTERM_BP_DIRECT	GO:0006366~transcription from RNA polymerase II promoter	5	6.0241	0.00191266	EGR1, FOS, EGR2, FOSB, JUNB	70	138	18082	9.35921	0.752805	0.20779	2.86164
P35_HC_UP	INTERPRO	IPR008160:Collagen triple helix repeat	4	4.81928	0.00239931	COL6A1, COL8A1, COL11A1, COL5A1	73	76	20594	14.8479	0.413327	0.413327	3.01589
P35_HC_UP	GOTERM_CC_DIRECT	GO:0005581~collagen trimer	4	4.81928	0.00337171	COL6A1, COL8A1, COL11A1, COL5A1	72	83	19662	13.1606	0.344381	0.100165	3.83039
P35_HC_UP	GOTERM_BP_DIRECT	GO:0045944~positive regulation of transcription from RNA polymerase II promoter	11	13.253	0.00430604	EGR1, MEF2C, FOS, SATB2, EGR2, NDN, OTX2, NR4A1, FOSB, NPAS4, JUNB	70	995	18082	2.85574	0.957156	0.36239	6.3348
P35_HC_UP	GOTERM_BP_DIRECT	GO:0035987~endodermal cell differentiation	3	3.61446	0.00473617	COL6A1, COL8A1, COL11A1	70	27	18082	28.7016	0.968746	0.35157	6.94655
P35_HC_UP	GOTERM_MF_DIRECT	GO:0031751~D4 dopamine receptor binding	2	2.40964	0.00755211	PPP1R1B, CLIC6	67	2	17446	260.388	0.811333	0.340941	9.19888
P35_HC_UP	KEGG_PATHWAY	mmu04974:Protein digestion and absorption	4	4.81928	0.00982894	COL6A1, COL11A1, COL5A1, KCNJ13	40	88	7691	8.73977	0.527962	0.31295	9.87222
